# Supplementary material for: Genome of the ramshorn snail Biomphalaria straminea—an obligate intermediate host of schistosomiasis
Source: PubMed Central journal article supplement (PMC8848322; doi:10.1093/gigascience/giac012), 2022-02-15

## Genome of the ramshorn snail *Biomphalaria straminea* - an obligate intermediate host of schistosomiasis --Manuscript Draft--

|                                                      |                                                                                                                                                                                                                                                                                                                                                                                                                                                                                                                                                                                                                                                                                                                                                                                                                                                                                                                                                                                                                                                                                                                                                                                                                                                                                                                                                                                                                                                                                                                                                                                                                                                                                                                                                                                                                                                                                                                                                                                                                                                                                                                                             |                |
|------------------------------------------------------|---------------------------------------------------------------------------------------------------------------------------------------------------------------------------------------------------------------------------------------------------------------------------------------------------------------------------------------------------------------------------------------------------------------------------------------------------------------------------------------------------------------------------------------------------------------------------------------------------------------------------------------------------------------------------------------------------------------------------------------------------------------------------------------------------------------------------------------------------------------------------------------------------------------------------------------------------------------------------------------------------------------------------------------------------------------------------------------------------------------------------------------------------------------------------------------------------------------------------------------------------------------------------------------------------------------------------------------------------------------------------------------------------------------------------------------------------------------------------------------------------------------------------------------------------------------------------------------------------------------------------------------------------------------------------------------------------------------------------------------------------------------------------------------------------------------------------------------------------------------------------------------------------------------------------------------------------------------------------------------------------------------------------------------------------------------------------------------------------------------------------------------------|----------------|
| <b>Manuscript Number:</b>                            | GIGA-D-21-00243R2                                                                                                                                                                                                                                                                                                                                                                                                                                                                                                                                                                                                                                                                                                                                                                                                                                                                                                                                                                                                                                                                                                                                                                                                                                                                                                                                                                                                                                                                                                                                                                                                                                                                                                                                                                                                                                                                                                                                                                                                                                                                                                                           |                |
| <b>Full Title:</b>                                   | Genome of the ramshorn snail <i>Biomphalaria straminea</i> - an obligate intermediate host of schistosomiasis                                                                                                                                                                                                                                                                                                                                                                                                                                                                                                                                                                                                                                                                                                                                                                                                                                                                                                                                                                                                                                                                                                                                                                                                                                                                                                                                                                                                                                                                                                                                                                                                                                                                                                                                                                                                                                                                                                                                                                                                                               |                |
| <b>Article Type:</b>                                 | Research                                                                                                                                                                                                                                                                                                                                                                                                                                                                                                                                                                                                                                                                                                                                                                                                                                                                                                                                                                                                                                                                                                                                                                                                                                                                                                                                                                                                                                                                                                                                                                                                                                                                                                                                                                                                                                                                                                                                                                                                                                                                                                                                    |                |
| <b>Funding Information:</b>                          | Hong Kong Research Grant Council (Collaborative Research Fund (C4015-20EF), General Research Fund (14100919))                                                                                                                                                                                                                                                                                                                                                                                                                                                                                                                                                                                                                                                                                                                                                                                                                                                                                                                                                                                                                                                                                                                                                                                                                                                                                                                                                                                                                                                                                                                                                                                                                                                                                                                                                                                                                                                                                                                                                                                                                               | Dr. Jerome Hui |
| <b>Abstract:</b>                                     | <p><b>Background</b><br/>Schistosomiasis or bilharzia is a parasitic disease caused by trematode flatworms of the genus <i>Schistosoma</i>. Infection of <i>S. schistosoma mansoni</i> in humans results when cercariae emerge into water from freshwater snails in the genus <i>Biomphalaria</i>, and seek out and penetrate human skin. The snail <i>Biomphalaria straminea</i> is native to South America and is now also present in Central America and China, and represents a potential vector host for spreading schistosomiasis. To date, genomic information for the genus is restricted to the neotropical species <i>Biomphalaria glabrata</i>. This limits understanding of the biology and management of other schistosomiasis vectors, such as <i>B. straminea</i>.</p> <p><b>Findings</b><br/>Using a combination of Illumina short-read, 10X Genomics linked-read, and Hi-C sequencing data, our 1.005 Gbp <i>B. straminea</i> genome assembly is of high contiguity, with a scaffold N50 of 25.3 Mbp. Transcriptomes from adults were also obtained. Developmental homeobox genes, hormonal genes, and stress-response genes were identified, and repeat content was annotated (40.68% of genomic content). Comparisons with other mollusc genomes (including Gastropoda, Bivalvia and Cephalopoda) revealed syntenic conservation, patterns of homeobox gene linkage indicative of evolutionary changes to gene clusters, expansion of heat shock protein genes, and the presence of sesquiterpenoid and cholesterol metabolic pathway genes in Gastropoda. In addition, hormone treatment together with RT-qPCR assay reveal a sesquiterpenoid hormone responsive system in <i>B. straminea</i>, illustrating this renowned insect hormonal system is also present in the lophotrochozoan lineage.</p> <p><b>Conclusion</b><br/>This study provides the first genome assembly for the snail <i>B. straminea</i> and offers an unprecedented opportunity to address a variety of biology related to snail vectors of schistosomiasis, as well as evolutionary and genomics questions related to molluscs more widely.</p> |                |
| <b>Corresponding Author:</b>                         | Jerome Hui<br><br>HONG KONG                                                                                                                                                                                                                                                                                                                                                                                                                                                                                                                                                                                                                                                                                                                                                                                                                                                                                                                                                                                                                                                                                                                                                                                                                                                                                                                                                                                                                                                                                                                                                                                                                                                                                                                                                                                                                                                                                                                                                                                                                                                                                                                 |                |
| <b>Corresponding Author Secondary Information:</b>   |                                                                                                                                                                                                                                                                                                                                                                                                                                                                                                                                                                                                                                                                                                                                                                                                                                                                                                                                                                                                                                                                                                                                                                                                                                                                                                                                                                                                                                                                                                                                                                                                                                                                                                                                                                                                                                                                                                                                                                                                                                                                                                                                             |                |
| <b>Corresponding Author's Institution:</b>           |                                                                                                                                                                                                                                                                                                                                                                                                                                                                                                                                                                                                                                                                                                                                                                                                                                                                                                                                                                                                                                                                                                                                                                                                                                                                                                                                                                                                                                                                                                                                                                                                                                                                                                                                                                                                                                                                                                                                                                                                                                                                                                                                             |                |
| <b>Corresponding Author's Secondary Institution:</b> |                                                                                                                                                                                                                                                                                                                                                                                                                                                                                                                                                                                                                                                                                                                                                                                                                                                                                                                                                                                                                                                                                                                                                                                                                                                                                                                                                                                                                                                                                                                                                                                                                                                                                                                                                                                                                                                                                                                                                                                                                                                                                                                                             |                |
| <b>First Author:</b>                                 | Wenyan Nong                                                                                                                                                                                                                                                                                                                                                                                                                                                                                                                                                                                                                                                                                                                                                                                                                                                                                                                                                                                                                                                                                                                                                                                                                                                                                                                                                                                                                                                                                                                                                                                                                                                                                                                                                                                                                                                                                                                                                                                                                                                                                                                                 |                |
| <b>First Author Secondary Information:</b>           |                                                                                                                                                                                                                                                                                                                                                                                                                                                                                                                                                                                                                                                                                                                                                                                                                                                                                                                                                                                                                                                                                                                                                                                                                                                                                                                                                                                                                                                                                                                                                                                                                                                                                                                                                                                                                                                                                                                                                                                                                                                                                                                                             |                |
| <b>Order of Authors:</b>                             | Wenyan Nong                                                                                                                                                                                                                                                                                                                                                                                                                                                                                                                                                                                                                                                                                                                                                                                                                                                                                                                                                                                                                                                                                                                                                                                                                                                                                                                                                                                                                                                                                                                                                                                                                                                                                                                                                                                                                                                                                                                                                                                                                                                                                                                                 |                |
|                                                      | Yifei Yu                                                                                                                                                                                                                                                                                                                                                                                                                                                                                                                                                                                                                                                                                                                                                                                                                                                                                                                                                                                                                                                                                                                                                                                                                                                                                                                                                                                                                                                                                                                                                                                                                                                                                                                                                                                                                                                                                                                                                                                                                                                                                                                                    |                |
|                                                      | Madeleine E. Aase-Remedios                                                                                                                                                                                                                                                                                                                                                                                                                                                                                                                                                                                                                                                                                                                                                                                                                                                                                                                                                                                                                                                                                                                                                                                                                                                                                                                                                                                                                                                                                                                                                                                                                                                                                                                                                                                                                                                                                                                                                                                                                                                                                                                  |                |
|                                                      |                                                                                                                                                                                                                                                                                                                                                                                                                                                                                                                                                                                                                                                                                                                                                                                                                                                                                                                                                                                                                                                                                                                                                                                                                                                                                                                                                                                                                                                                                                                                                                                                                                                                                                                                                                                                                                                                                                                                                                                                                                                                                                                                             |                |

|                                                                                                                                                                                                                                                                                                  |                                                                               |
|--------------------------------------------------------------------------------------------------------------------------------------------------------------------------------------------------------------------------------------------------------------------------------------------------|-------------------------------------------------------------------------------|
|                                                                                                                                                                                                                                                                                                  | Yichun Xie                                                                    |
|                                                                                                                                                                                                                                                                                                  | Wai Lok So                                                                    |
|                                                                                                                                                                                                                                                                                                  | Yiqian Li                                                                     |
|                                                                                                                                                                                                                                                                                                  | Cheuk Fung Wong                                                               |
|                                                                                                                                                                                                                                                                                                  | Toby Baril                                                                    |
|                                                                                                                                                                                                                                                                                                  | Sean TS Law                                                                   |
|                                                                                                                                                                                                                                                                                                  | Sheung Yee Lai                                                                |
|                                                                                                                                                                                                                                                                                                  | Jasmine Haimovitz                                                             |
|                                                                                                                                                                                                                                                                                                  | Thomas Swale                                                                  |
|                                                                                                                                                                                                                                                                                                  | Shan-shan Chen                                                                |
|                                                                                                                                                                                                                                                                                                  | Zhen-peng Kai                                                                 |
|                                                                                                                                                                                                                                                                                                  | Xi Sun                                                                        |
|                                                                                                                                                                                                                                                                                                  | Zhongdao Wu                                                                   |
|                                                                                                                                                                                                                                                                                                  | Alexander Hayward                                                             |
|                                                                                                                                                                                                                                                                                                  | David Ferrier                                                                 |
|                                                                                                                                                                                                                                                                                                  | Jerome Hui                                                                    |
| <b>Order of Authors Secondary Information:</b>                                                                                                                                                                                                                                                   |                                                                               |
| <b>Response to Reviewers:</b>                                                                                                                                                                                                                                                                    | The data availability section has now been completed as requested. Thank you. |
| <b>Additional Information:</b>                                                                                                                                                                                                                                                                   |                                                                               |
| <b>Question</b>                                                                                                                                                                                                                                                                                  | <b>Response</b>                                                               |
| Are you submitting this manuscript to a special series or article collection?                                                                                                                                                                                                                    | No                                                                            |
| <b>Experimental design and statistics</b>                                                                                                                                                                                                                                                        | Yes                                                                           |
| Full details of the experimental design and statistical methods used should be given in the Methods section, as detailed in our <a href="#">Minimum Standards Reporting Checklist</a> . Information essential to interpreting the data presented should be made available in the figure legends. |                                                                               |
| Have you included all the information requested in your manuscript?                                                                                                                                                                                                                              |                                                                               |
| <b>Resources</b>                                                                                                                                                                                                                                                                                 | Yes                                                                           |
| A description of all resources used, including antibodies, cell lines, animals and software tools, with enough information to allow them to be uniquely identified, should be included in the                                                                                                    |                                                                               |

|                                                                                                                                                                                                                                                                                                                                                                                                                                                                                                                                                         |            |
|---------------------------------------------------------------------------------------------------------------------------------------------------------------------------------------------------------------------------------------------------------------------------------------------------------------------------------------------------------------------------------------------------------------------------------------------------------------------------------------------------------------------------------------------------------|------------|
| <p>Methods section. Authors are strongly encouraged to cite <a href="#">Research Resource Identifiers</a> (RRIDs) for antibodies, model organisms and tools, where possible.</p> <p>Have you included the information requested as detailed in our <a href="#">Minimum Standards Reporting Checklist</a>?</p>                                                                                                                                                                                                                                           |            |
| <p><b>Availability of data and materials</b></p> <p>All datasets and code on which the conclusions of the paper rely must be either included in your submission or deposited in <a href="#">publicly available repositories</a> (where available and ethically appropriate), referencing such data using a unique identifier in the references and in the “Availability of Data and Materials” section of your manuscript.</p> <p>Have you have met the above requirement as detailed in our <a href="#">Minimum Standards Reporting Checklist</a>?</p> | <p>Yes</p> |

1 **Genome of the ramshorn snail *Biomphalaria straminea* - an obligate intermediate host of**  
2 **schistosomiasis**

3 Wenyan Nong<sup>1,^</sup>, Yifei Yu<sup>1,^</sup>, Madeleine E. Aase-Remedios<sup>3,^</sup>, Yichun Xie<sup>1,^</sup>, Wai Lok So<sup>1,^</sup>,  
4 Yiqian Li<sup>1,^</sup>, Cheuk Fung Wong<sup>1,^</sup>, Toby Baril<sup>2,^</sup>, Sean T. S. Law<sup>1,^</sup>, Sheung Yee Lai<sup>1</sup>, Jasmine  
5 Haimovitz<sup>4</sup>, Thomas Swale<sup>4</sup>, Shan-shan Chen<sup>5</sup>, Zhen-peng Kai<sup>6</sup>, Sun Xi<sup>7</sup>, Zhongdao Wu<sup>7</sup>,  
6 Alexander Hayward<sup>2,\*</sup>, David E.K. Ferrier<sup>3,\*</sup>, Jerome H.L. Hui<sup>1,\*</sup>

7 1. School of Life Science, Simon F.S. Li Marine Science Laboratory, State Key Laboratory of  
8 Agrobiotechnology, The Chinese University of Hong Kong, Hong Kong, China

9 2. University of Exeter, United Kingdom

10 3. The Scottish Oceans Institute, Gatty Marine Laboratory, School of Biology, University of St.  
11 Andrews, United Kingdom

12 4. Dovetail Genomics, United States of America

13 5. Institute of Agro-food Standard and Testing Technology, Shanghai Academy of Agricultural  
14 Sciences, Shanghai, China

15 6. School of Chemical and Environmental Engineering, Shanghai Institute of Technology,  
16 Shanghai, China

17 7. Sun Yat-sen University, Guangdong, China

18 ^ = contributed equally;

19 \*=correspondence:

20 alex.hayward@exeter.ac.uk; dekf@st-andrews.ac.uk; jeromehui@cuhk.edu.hk

1 **ORCID IDs:**

2 Wenyan Nong [0000-0002-3277-716X]

3 Madeleine E Aase-Remedios [0000-0001-6829-0815]

4 Wai Lok So [ 0000-0001-5048-5454]

5 Yichun Xie [0000-0002-1744-5749]

6 Wu Zhongdao [0000-0001-5879-9757]

7 Sun Xi [0000-0003-2213-2763]

8 Zhen-peng Kai [0000-0003-4861-942X]

9 Shan-shan Chen [0000-0002-1404-7147]

10 Alexander Hayward [0000-0001-7413-718X]

11 David E K Ferrier [0000-0003-3247-6233]

12 Jerome H L Hui [0000-0003-1355-8495]

13

14

15

16

17

18

1 **Abstract**

2 **Background**

3 Schistosomiasis or bilharzia is a parasitic disease caused by trematode flatworms of the  
4 genus *Schistosoma*. Infection by *Schistosoma mansoni* in humans results when cercariae emerge  
5 into water from freshwater snails in the genus *Biomphalaria*, and seek out and penetrate human  
6 skin. The snail *Biomphalaria straminea* is native to South America and is now also present in  
7 Central America and China, and represents a potential vector host for spreading schistosomiasis.  
8 To date, genomic information for the genus is restricted to the neotropical species *Biomphalaria*  
9 *glabrata*. This limits understanding of the biology and management of other schistosomiasis  
10 vectors, such as *B. straminea*.

11 **Findings**

12 Using a combination of Illumina short- read, 10X Genomics linked- read, and Hi- C sequencing  
13 data, our 1.005 Gbp *B. straminea* genome assembly is of high contiguity, with a scaffold N50 of  
14 25.3 Mbp. Transcriptomes from adults were also obtained. Developmental homeobox genes,  
15 hormonal genes, and stress-response genes were identified, and repeat content was annotated  
16 (40.68% of genomic content). Comparisons with other mollusc genomes (including Gastropoda,  
17 Bivalvia and Cephalopoda) revealed syntenic conservation, patterns of homeobox gene linkage  
18 indicative of evolutionary changes to gene clusters, expansion of heat shock protein genes, and the  
19 presence of sesquiterpenoid and cholesterol metabolic pathway genes in Gastropoda. In addition,  
20 hormone treatment together with RT-qPCR assay reveal a sesquiterpenoid hormone responsive  
21 system in *B. straminea*, illustrating this renowned insect hormonal system is also present in the  
22 lophotrochozoan lineage.

## 1 **Conclusion**

2 This study provides the first genome assembly for the snail *B. straminea* and offers an  
3 unprecedented opportunity to address a variety of biology related to snail vectors of  
4 schistosomiasis, as well as evolutionary and genomics questions related to molluscs more widely.

5

## 6 **Background**

7 With over 240 million people worldwide estimated to require treatment, the World Health  
8 Organisation considers schistosomiasis to be the second most prevalent parasitic disease after  
9 malaria (<https://www.who.int/health-topics/schistosomiasis>). As such, schistosomiasis is a global  
10 health problem that causes considerable economic and social burdens.

11 Infection by *Schistosoma mansoni* (NCBI:txid6183) in humans results when cercariae  
12 emerge into the water from their freshwater snail intermediate hosts in the genus *Biomphalaria*,  
13 and seek out and penetrate submerged body parts through the skin. Once inside the human body,  
14 adult worms lay eggs, which are deposited in the blood venules and will cross the intestinal wall  
15 to leave the body in the faeces. In addition, eggs that fail to cross the intestinal wall (named “reflux  
16 eggs”) circulate to the liver where they grow, emerge, and cause pathology. Miracidia larvae hatch  
17 from eggs that reach water, then seek out and penetrate a new snail intermediate host. Following  
18 this, sporocysts develop in the infected snails, and subsequently free-living cercariae emerge from  
19 the snail into the water, completing the parasitic life cycle. Among the 34 described species  
20 of *Biomphalaria* snails, 18 species (including *B. straminea*) have been demonstrated to be  
21 potential vectors for *S. mansoni*. Different geographical locations are dominated by different  
22 species of *Biomphalaria*.

1           The native range of *Biomphalaria* snails is South America and Africa (Campbell et al 2000;  
2 DeJong 2001). However, several species have been introduced to other areas, presenting a risk of  
3 schistosomiasis infection. The occurrence of *B. straminea* in Asia was first reported at Lam Tsuen  
4 valley in Hong Kong during the 1970s (Meier-Brook 1974; Figure 1A), presumably having  
5 somehow spread from its native range in South America into Central America and southern China  
6 (Yang et al., 2018). *B. straminea* have since been identified at a number of locations in Hong Kong  
7 and Guangdong Province (Attwood et al 2015; Dudgeon and Yipp 1983; Meier-Brook 1974;  
8 Woodruff et al 1985; Zeng et al 2017). While *S. mansoni* is not yet endemic in either Hong Kong  
9 or mainland China, cases of schistosomiasis caused by the parasite are currently increasing in  
10 China. According to the records from the database of the National Notifiable Disease Report  
11 System (NNDRS), 355 cases of imported schistosomiasis cases had been reported in 15 provinces  
12 in China between 1979 and 2019, including 78 cases infected with *S. mansoni*, 262 cases with *S.*  
13 *haematobia*, and 15 cases with unidentified *Schistosoma*. Since *B. straminea* had already been  
14 discovered in Guangdong province in southern China, it is believed that the imported *S. mansoni*  
15 increases the risk of its transmission in China. (Zhu and Xu 2014; Wang et al 2020).

16           Whole genome sequences are valuable resources for obtaining deeper understanding of the  
17 biology of any organism. Despite the importance of the phylum Mollusca, there is a lack of  
18 genomic resources (Davison and Neiman 2021). In the case of *B. straminea*, such a resource will  
19 impact questions of how they may interact with *S. mansoni* and how similar the genetic  
20 mechanisms are between different *Biomphalaria* species, with possible implications for how  
21 treatments and management strategies might be transferable. To date, only the genome of  
22 *Biomphalaria glabrata* has been sequenced and analysed (Adema et al 2017; Tennessen et al 2020;  
23 Figure 1B), and a high-quality genome of *B. straminea* is lacking, hindering further understanding



1 of the species. To address this issue, we provide and analyse a high-quality genome assembly  
2 for *B. straminea* together with accompanying transcriptomes.

3

4

5

6

7

8

9

10

11

12

13

14

15

## 1 **Results and Discussion**

### 2 ***Genome quality evaluation***

3           Genomic DNA was extracted from single individuals of *B. straminea* (Figure 1A). Genome  
4 sequences were first assembled using short-reads followed by scaffolding with Hi-C data. The  
5 genome assembly (without the mitochondrial genome) is 1.005 Gbp with a scaffold N50 of  
6 25.3 Mbp (Figure 1B). This high physical contiguity is matched by high completeness, with an  
7 87.0% complete BUSCO score (Simao et al 2015) (Figure 1B). A total of 43,340 gene models,  
8 including 3,122 tRNA and 40,218 protein-coding genes, were generated by mapping transcriptome  
9 data to the genome assembly (S1. Sequencing data). The mean exon length is 262 bp, mean intron  
10 length is 1,603 bp, and mean deduced protein length is 377 aa. The genome quality generated in  
11 this study is comparable to the previously published genome assemblies of another schistosomiasis  
12 carrying vector snail, *B. glabrata* (Adema et al 2017; Tennessen et al 2020; Figure 1B).

13

### 14 ***Repeat element analysis***

15           We identified a total repeat content of 40.68% in the genome of *B. straminea* (Figure 1C),  
16 demonstrating that repeats make up a large proportion of total genome size in the species. A  
17 considerable proportion of repeats were unclassified (15.81%), suggesting that many of the  
18 annotated repeats represent new repeat families (Figure 1C), which is not unexpected given the  
19 relatively sparse attention given to the analysis of repeats in gastropod molluscs to date. Of the  
20 remaining repeats, LINE elements and DNA transposons are most abundant (LINEs: 10.48%,  
21 DNA transposons: 8.32%), whereas SINEs, LTR elements, and rolling-circle elements are present

1 only in low proportions (LTR elements: 2.7%, rolling-circle elements: 1.71%, SINEs: 1.31%)  
2 (Figure 1C). Consideration of a repeat landscape plot suggests that there has been a long-term  
3 ongoing expansion of repeats in *B. straminea*, with a recent spike in activity. The recent spike is  
4 evident from the relatively large percentage of repeats in the genome that are separated from their  
5 family consensus sequences by short distances, while the long tail of increasing divergence from  
6 the consensus is suggestive of a gradual increase in activity over a relatively long time period  
7 (Figure 1C). LINEs and DNA transposons have expanded most significantly, however, there has  
8 also been a less considerable expansion of LTR and Rolling circle elements (Figure 1C).

9

## 10 ***Homeobox-containing gene content and linkage***

### 11 a) Hox cluster genes

12 Homeobox genes are transcription factors involved in regulating animal development. Not  
13 only are they highly conserved between distantly related lineages, but also many of the genes are  
14 linked or clustered in genomes. Besides the most well-known clusters like the Hox and ParaHox  
15 clusters, many homeobox genes are linked including other ANTP class genes in NK and SuperHox  
16 clusters, and also amongst other classes of PRD, TALE, and SINE homeobox genes (Butts et al.,  
17 2008; Mazza et al., 2010; Ferrier, 2016). These clusters have been maintained or dispersed  
18 differently in different animal lineages. Changes to gene clustering may represent the breakdown  
19 of regulatory constraints which normally maintain clusters and are thought to be the mechanism  
20 holding together the tightly regulated Hox cluster, for instance. Genomic clustering also reflects  
21 the ancient origins of many of these homeobox genes by tandem duplication, e.g., the four ANTP  
22 clusters in the bilaterian ancestor that arose via subsequent expansions from a single Proto-ANTP  
23 gene (Hui et al., 2012). Among molluscs, a diverse phylum to which gastropods belong, alongside

1 other conchiferans (monoplacophorans, bivalves, scaphopods, and cephalopods), as well as  
2 aculiferans (aplacophorans and polyplacophorans), some of the diversity of body plans may be  
3 underpinned by changes to developmental genes like homeobox genes. Hox genes have been co-  
4 opted to the development of novel morphological structures in cephalopods (Lee et al., 2003), and  
5 this corresponds to a breakdown of the Hox cluster across several large scaffolds, and the loss of  
6 a few genes (Albertin et al., 2015). Other mollusc genomes show a breakdown of homeobox  
7 clustering overall, like the Pacific oyster (*Crassostrea gigas*; Paps et al., 2015), while a more recent  
8 chromosome-level assembly reveals large-scale patterns of linkage in *Magallana hongkongensis*  
9 (Li et al., 2020). This genome assembly of *B. straminea* improves our understanding of homeobox  
10 gene linkage in comparison to other molluscs, which are lophotrochozoans and, alongside well-  
11 studied ecdysozoans like flies, provide a more thorough protostome comparison to vertebrates,  
12 which are within the Deuterostomia.

13 We found 114 homeobox genes in the genome of *B. straminea*, belonging to eleven  
14 recognized classes and one lophotrochozoan-specific gene, *Lopx* (Supplementary information S2a;  
15 Barton-Owen et al., 2018). Many of these genes are clustered (situated on the same chromosome  
16 with no or very few non-homeobox genes in between) or linked (on the same chromosome, but  
17 with intervening non-homeobox genes) in the genome (Figure 2). Nine of the eleven Hox genes  
18 are found on scaffold 32695, in an arrangement that suggests several intrachromosomal  
19 rearrangements. In an ordered cluster as seen in the gastropod, *L. gigantea*, for instance, the Hox  
20 genes are situated in the genome in the ancestral bilaterian order from anterior-acting *Hox1* to  
21 posterior-acting *Post1*, and no other non-Hox genes are found amongst the Hox genes (Simakov  
22 et al., 2013). Here, however, we find that *Hox2*, *Hox3*, and *Hox4* are upstream of *Hox5*. In addition,  
23 *Hox2-Hox5* are downstream of the posterior half of the cluster, including *Lox5*, *Hox7*, *Lox4*, *Lox2*,

1 and *Post1*. *Hox1* is found on another scaffold, while the sequence for *Post2* is not in the genomic  
2 assembly, though its sequence is found in our transcriptome data. The Hox arrangement in *B.*  
3 *straminea* provides more linkage information than the *B. glabrata* assembly, where the short  
4 scaffolds corroborate only fragments of the Hox cluster like the linkage of *Hox4*, *Hox3*, and *Hox2*,  
5 but do not confirm the rearrangements in *B. straminea*, such as the linkage of *Hox5* to *Hox2*  
6 (Supplementary information S2b). We do see a difference in the arrangement of the posterior half  
7 of the Hox cluster, however, where in *B. glabrata*, *Lox4*, *Lox2*, *Post2*, and *Post1* are linked in that  
8 order on scaffold 139, with *Lox4* and *Lox2* in the negative strand and *Post2* and *Post1* on the  
9 positive, which is slightly different from many other molluscs in which only *Post1* differs in  
10 orientation relative to the remainder of the posterior end of the Hox cluster genes (Simakov et al.,  
11 2013; Li et al., 2020). In *B. straminea*, there has been a rearrangement separating *Post1*, placing it  
12 with *Lox5* and *Hox7* and in the same orientation as *Lox4* and *Lox2* (Figure 2). Thus, the Hox genes  
13 of *Biomphalaria* seem highly rearranged relative to the ancestral order and each other. Clearly  
14 then, there are no (or minimal) long-range regulatory mechanisms operating across these genes  
15 that could have constrained their organization and prevented rearrangement. At most, there may  
16 be remains of some form of sub-cluster mechanisms, such as enhancer sharing, operating over the  
17 small regions (i.e. *Hox2-4* and *Lox2-4*) whose similar arrangement may be indicative of constraints  
18 conserved across *Biomphalaria* species. Future expression and regulatory element analyses may  
19 help resolve this possibility.

## 20 b) ParaHox cluster genes

21 The ParaHox cluster is the evolutionary sister to the Hox cluster (Brooke et al., 1998). The  
22 homeodomains of the three ParaHox genes (*Gsx*, *Xlox* and *Cdx*) are found on three separate

1 scaffolds in *B. straminea* (Figure 2), however, three upstream exons of *Cdx* are on scaffold 5393,  
2 which also has the *Xlox* gene (Supplementary information S2a). This is in contrast to the genome  
3 of *B. glabrata*, where *Gsx* and *Xlox* are linked on scaffold 3 (Supplementary information S2a-b).  
4 Perhaps this pattern reflects maintained linkage between all three ParaHox genes in *Biomphalaria*  
5 species and only because of the draft level of all the assemblies this is not evident. However, if  
6 this is the case, the ParaHox genes are separated by large amounts of sequence and have not  
7 retained the ancestral order of *Gsx-Xlox-Cdx*. *B. glabrata* *Xlox* is nearly 4 Mb from the start of its  
8 scaffold, while in *B. straminea*, *Xlox* is at a location with another homeobox-containing gene  
9 (*Phox*) 15 Mb away on one side and the first three *Cdx* exons are almost 5 Mb away on the other  
10 side of *Xlox*. Thus, although the *Biomphalaria* ParaHox genes may be linked, they cannot be  
11 considered to be clustered. This dispersal of ParaHox genes is typical for molluscs in general, with  
12 several species also showing loose linkage of some of the genes (Li et al., 2020), which contrasts  
13 with the relatively tight clustering of these genes in many deuterostomes (Osborne et al., 2009;  
14 Ikuta et al., 2013; Zhang et al., 2017) and the likely pan-cluster regulation that may operate in these  
15 deuterostomes.

#### 16 c) ANTP-class homeobox genes

17 Beyond Hox and ParaHox, there are other linkages among and between the classes of  
18 homeobox genes that hint at their ancient evolutionary origins and genomic arrangement in clusters.  
19 Despite the many rearrangements to the Hox cluster, many genes linked to Hox clusters in other  
20 species are also found on the same scaffold in *B. straminea*, including *Mnx*, *Gbx-a* and *Gbx-b*, *En-*  
21 *a*, *Eyx-a* and *Eyx-b*, and *Dlx* (Castro and Holland, 2003; Chourrout et al., 2006; Butts et al., 2008;  
22 Hui et al., 2012; Li et al., 2020). These linkages give further support for the hypothesized Super-

1 Hox cluster of non-Hox ANTP-class genes linked to the Hox genes in bilaterians (Butts et al.,  
2 2008).

3 d) SINE homeobox genes

4 Another highly conserved cluster besides Hox and ParaHox is the SINE-class cluster,  
5 typically composed of the *Six3/6*, *1/2*, and *4/5* genes or their protostome orthologues (Ferrier,  
6 2016). In *B. straminea*, *Six4/5* and *Six1/2* are on the same scaffold, but with a number of genes  
7 between them, and *Six3/6* is on a distinct scaffold (Figure 2). In *B. glabrata*, *Six3/6* is linked to  
8 *Hlx* (Figure S2b), the last homeobox gene at the end of the *Six4/5-Six1/2* scaffold in *B. straminea*  
9 (Figure 2). Thus, there is clearly not a SINE-class gene cluster conserved in *B. straminea*, but the  
10 linkage of at least some of these genes indicates that the dispersal of this cluster has not yet  
11 proceeded to the extent of these genes being separated onto different chromosomes. Also, the  
12 location of the *Hlx* gene relative to different *Six* genes indicates a certain degree of genomic  
13 rearrangement between the two *Biomphalaria* species (i.e. conserved macrosynteny, but divergent  
14 microsynteny).

15 e) IRX homeobox genes

16 Homeobox genes in the IRX family within the TALE class, are also observed to be clustered in  
17 several lineages, for instance the three-gene (*ara*, *caup*, and *mirr*) cluster in *Drosophila*, two three-  
18 gene clusters in vertebrates, and four genes in the limpet *L. gigantea* (*irx4*, *irx2*, *irx1*, and *irx3*)  
19 (Irimia et al. 2008; Takatori et al., 2008; Kerner et al. 2009). These clusters are thought likely to  
20 have arisen convergently by independent tandem duplications in the arthropod, vertebrate, and  
21 mollusc lineages (Irimia et al., 2008; Takatori et al., 2008; Kerner et al., 2009; Chipman et al.,

1 2014). Both *Biomphalaria* species have five IRX-family genes, one pair of which appears to be a  
2 product of a more recent, possibly *Biomphalaria*-specific, duplication (*Irx1-a* and *Irx1-b*). Perhaps  
3 surprisingly, none of the *Biomphalaria* *Irx* genes, *Irx1* (*a* and *b*), *Irx2*, *Irx3*, and *Irx4*, show clear  
4 orthology to specific gastropod (limpet) or bivalve (oyster) genes in a phylogenetic tree  
5 (Supplementary information S2c). A paucity of phylogenetically-informative amino-acid changes  
6 is the most likely explanation for this lack of resolution. Despite this lack of resolution of *Irx*  
7 orthology across species the *B. straminea* genome assembly does provide a new example of *Irx*  
8 gene clustering. *Irx3*, *Irx2*, and *Irx4* are closely clustered in the genome, while *Irx1-b* is 7 Mb away  
9 on the same scaffold, also with *Zhx*, a ZF-class gene another 6 Mb further. The two *Irx1* paralogues,  
10 however, are on separate scaffolds, which may represent either a rearrangement following their  
11 duplication, convergence of the sequence of the homeodomain, or thirdly, an assembly artefact. In  
12 *B. glabrata*, only the linkage of *Irx4* with *Irx2* is corroborated due to the shorter scaffold lengths  
13 of that assembly. Further work, perhaps using other conserved domains from these genes and with  
14 a wider breadth of lophotrochozoan species could potentially determine whether in fact the four  
15 *Irx* gene types in *Biomphalaria* species are orthologous to genes in other species' *Irx* clusters. A  
16 multi-gene IRX-family cluster in *Biomphalaria* species with evidence of at least one independent  
17 expansion (*Irx1-a* and *Irx1-b*) provides an interesting addition to our understanding of IRX-family  
18 clusters, and the mechanisms behind gene expansions and subsequent maintenance of clustering  
19 in general.

20 f) PRD- and LIM- class homeobox genes

21 We also observe linkages amongst PRD-class genes, with clusters on scaffolds 13536,  
22 2216, 46009, and 563 (Figure 2). The PRD-class cluster that is widely found across various species



1 is the so-called HRO cluster, composed of the genes *Otp*, *Rx/Rax* and *Hbn/Arx-like* (Mazza et al.,  
2 2010; Ferrier, 2016), which ancestrally was likely embedded within a more extensive PRD/LIM-  
3 class mega-cluster, including the PRD-class genes *Gsc* and *Otx* and the LIM-class gene *Isl* (Ferrier,  
4 2016). In *B. straminea* there is a remnant of the HRO cluster, with *Otp* clustered with *Hbn*,  
5 internally on a large scaffold (563) and flanked by other homeobox genes (Figure 2) including  
6 another PRD-class gene (*Arx-a*) now in this *Biomphalaria* PRD-class cluster, but the *Rax* genes  
7 are on other scaffolds. Interestingly, the *Isl* gene is also on this large 563 scaffold in *B. straminea*,  
8 consistent with descent from the hypothesized PRD/LIM-class mega-cluster (Ferrier, 2016). *B.*  
9 *glabrata* provides an interesting contrast as the HRO cluster is now complete (with *Otp*, *Hbn* and  
10 *Rax-b*) in contrast to *B. straminea*, and again *Arx-a* is also in the *Biomphalaria* cluster (Figure 2;  
11 Supplementary Figure S2b). Why the PRD-class HRO cluster would remain intact in one species  
12 of *Biomphalaria* but not the other remains to be resolved. Also, whether the inclusion of the *Arx-*  
13 *a* gene in this cluster in these snails is found elsewhere in the animal kingdom and is of any  
14 functional significance also remains a topic for future work. Overall, the PRD-class gene clustering  
15 provides a mixed signal, of both conservation of remnants of ancient clustering alongside  
16 rearrangements between closely related, con-generic species.

#### 17 g) Duplicated homeobox genes

18 There are several duplications shared between the two species, which we infer to be at least  
19 ancestral to the genus. These include paralogues of *Arx*, *Pax4/6*, *Irx1*, *En*, *Evx*, *Abox*, *Barhl*, *Pbx*,  
20 and *Tlx*, as well as three paralogues of *Vsx* and *Cers*. Notably, the three paralogues each of *Vsx*  
21 and *Cers* genes remain clustered in the genome, reflecting their likely origin by tandem duplication.  
22 This is also seen for *En*, *Tlx*, *Evx*, and *Abox*. *B. straminea* is the only species of the two with two

1 paralogues of *Gbx*, though one has an apparently odd arrangement that would mean it is unlikely  
2 to be a functional gene, if this arrangement were real. The homeodomain is split across two exons,  
3 the first of which is in one orientation, while there are two copies of the second exon in the opposite  
4 orientation, indicating the second *Gbx* gene may be a pseudogene or an assembly artefact  
5 (Supplementary information S2a).

#### 6 h) Giga-cluster homeobox genes

7 An overarching framework for understanding the genomic organization of homeobox-  
8 containing genes comes from hypotheses about their ancient linkage patterns following their  
9 presumed origins largely via tandem duplications. This ancestral clustering goes beyond the class-  
10 specific clusters already described above and is captured by the Giga-cluster hypothesis (Ferrier,  
11 2016). High-quality genome assemblies, such as the one described here for *B. straminea*, are key  
12 resources for testing this hypothesis and potentially expanding it. Several instances of linkage of  
13 different classes of homeobox gene are present in the *B. straminea* assembly, most notably on  
14 scaffolds 563, 8789, 2216 and 24987 (Figure 2). Scaffold 2216 is interesting for the linkage of the  
15 SINE-class genes *Six4/5* and *Six1/2* with some of the members of the ancestral PRD/LIM-class  
16 Mega-cluster (i.e. the PRD-class genes *Gsc* and *Otx*) that has undergone some dispersal in  
17 the *Biomphalaria* lineage (as described above). Also, some of the other members of this dispersed  
18 PRD/LIM Mega-cluster (*Isl*, *Otp*, *Hbn*) are on scaffold 563, which are now linked with many  
19 members of the dispersed NK-cluster (e.g. *NK5*, *NK4*, *Msx*, *Tlx-a* and *-b*, and *NK3*) as well as a  
20 member of the ancestral SuperHox cluster (i.e. *Hhex*) (Butts et al., 2008; Ferrier, 2016). Other  
21 members of the SuperHox cluster are still linked with the true Hox genes (EuHox genes) on  
22 scaffold 32695. These linkages of genes from different homeobox classes along with the further

1 new instances of inter-class linkage on scaffolds 8798 (Figure 2) are all consistent with the Giga-  
2 cluster hypothesis (Ferrier, 2016). However, how much of all of these linkages represent ancestral  
3 associations (i.e. descended from primary clustering) versus instances of coming together in the  
4 genome convergently in evolution (i.e. secondary clustering) should be resolvable with  
5 comparisons to further high-quality genome sequences as well as a better understanding of the  
6 dynamics of genome evolution and rearrangements (reviewed in Ferrier, 2016).

7

### 8 ***Synteny analysis of B. straminea with other molluscs***

9 The homeobox analyses described above provide instances of linkages that indicate varied  
10 synteny conservation across various mollusc and animal clades, even between the two  
11 *Biomphalaria* species now sequenced. The *B. straminea* genome shows considerable conserved  
12 linkage within and between classes of homeobox, and the maintenance of certain conserved  
13 clusters or linkages observed throughout wider lineages (i.e. instances of remnants of the Hox,  
14 ParaHox, SuperHox, and Giga-clusters (Ferrier, 2016)). In comparison to *B. glabrata*, in which  
15 less linkage can be observed because of shorter scaffold lengths, there is some conserved synteny.  
16 A few differences between the species may be due to species-specific genomic rearrangements  
17 resulting in the disruption of gene order, but the alternative possibility of assembly artefacts cannot  
18 be excluded entirely at present without further work. Of particular interest for further study is the  
19 major rearrangement of the Hox cluster in *B. straminea*. Perhaps more thorough sequencing of *B.*  
20 *glabrata* or assemblies of additional *Biomphalaria* species could determine if this is shared in the  
21 genus, or if it is a novelty of *B. straminea*. Regardless of this, the impact of this rearrangement on  
22 Hox gene expression and function is of interest. Hox cluster rearrangements could indicate the loss

1 of shared regulatory elements that constrain Hox clusters in other lineages and may reflect changes  
2 to Hox gene expression, perhaps underpinning developmental changes in these snails. Similarly,  
3 the impacts of the dispersal of the ParaHox cluster on gene expression will be interesting to resolve.  
4 The patterns of clustering, linkage, and rearrangement of homeobox genes are good markers for  
5 genome organization, and these results show that key differences between the species may  
6 represent higher levels of genomic divergence than expected for these two snails. Here we observe  
7 specific cases of differences between our new *B. straminea* genome and that of *B. glabrata* within  
8 the context of ancestral linkages, and this pattern may be a good indicator of wider differences  
9 between the genetics and molecular processes operating in the two species.

10 To examine the syntenic relationships more generally between *Biomphalaria* and mollusc  
11 genomes, we constructed Oxford dot-plots, comparing the chromosomal positions of orthologous  
12 genes between published mollusc genomes, as available from GenBank for gastropod, bivalve and  
13 cephalopod molluscs. As shown in Figure 4, the relationship of pseudo-chromosomes ( $2n=36$ ,  
14 Adema et al 2017) and scaffolds between *B. straminea* and molluscs of other classes were  
15 conserved in most cases. Previous phylogenetic tree constructions for different *Biomphalaria*  
16 species suggested a monophyletic clade of African species with the remaining lineages being  
17 neotropical species (Campbell et al 2000; DeJong 2001). Based on this phylogenetic relationship,  
18 our data show that the neotropical species have not undergone any significant inter-chromosomal  
19 rearrangements from their last common ancestor after separation to different geographical regions.  
20 One-to-one synteny block could be identified between *B. straminea* and the eupulmonata  
21 gastropod, *Achatina immaculata*. However, in the comparison of *B. straminea* to the more  
22 evolutionary distant species, a few one-to-many blocks were found. These patterns indicated that  
23 some chromosome duplication and alteration occurred from the most recent common ancestor of

1 *B. straminea*, *B. glabrata* and *A. immaculata* (the ancestor of Hygrophila and Eupulmonata).  
2 Further, species with closer evolutionary distance shared more similar synteny patterns against *B.*  
3 *straminea* (for example, between *Pomacea canaliculata* and *Marisa cornuarietis*, as well as  
4 between *Crassostrea gigas* and *M. hongkongensis*, which share more similar synteny blocks),  
5 suggesting the dynamic changes of chromosome arrangements in different molluscs. In *Octopus*  
6 *sinensis*, the gene order and synteny blocks to *B. straminea* were largely lost suggesting more  
7 duplication, translocation and rearrangement events occurred since the divergence of *O. sinensis*  
8 (Cephalopoda) and the common ancestor of Gastropoda and Bivalvia (Smith et al 2011).

9

#### 10 ***Ecdysteroid genes***

11 Ecdysteroids play important roles in regulating growth (in particular molting and  
12 metamorphosis) and sexual maturation of insects and other arthropods (Cheong et al 2015; Qu et  
13 al 2015). Although it has long been known that gastropods contain ecdysteroids, and that beta-  
14 ecdysone could stimulate host location activities in *S. mansoni* miracidia and enhance growth and  
15 egg production in *B. glabrata* (Bayne 1972; Shiff and Dossaji 1991), the biosynthetic pathway  
16 genes for ecdysteroids have not been systematically studied in mollusc genomes to date. As shown  
17 in Figure 3A-B, typical genes involved in this pathway including *CYP307A1*, *CYP306A1*,  
18 *CYP302A1*, *CYP315A1* and *CYP314A1* are all absent from the *B. straminea* genome assembly and  
19 transcriptome data. Nevertheless, the receptors including EcR, RXR/USP and oxygenase-like  
20 protein Nvd that are essential regulators of cholesterol metabolism are present in *B. straminea* and  
21 other mollusc genomes (Figure 3A-B; Supplementary information S3). We thus treated *B.*  
22 *straminea* with  $10^{-6}$  M ecdysteroid 20-hydroxyecdysone for 24 hours but did not observe any  
23 significant expression changes in the downstream genes *E74*, *FOXO*, and *Nvd*. Similar hormone

1 treatments have been shown to elicit the downstream genes in insects in previous studies (Hossain  
2 et al, 2013; Sekimoto et al 2007; Ji et al 2021). It is unclear whether only certain forms of  
3 ecdysteroids may induce endogenous ecdysteroid pathway genes under particular conditions and  
4 this warrants further investigation. This is the first systematic analyses of ecdysteroid pathway  
5 genes in a mollusc genome, thus providing the foundations for future work to determine how  
6 ecdysteroids have their effect in these animals.

7

### 8 ***Insulin signaling pathway genes***

9 Peptide hormones involved in growth and reproduction have been suggested as candidates  
10 for the development of novel methods of schistosomiasis control via manipulation of snail numbers  
11 (Acker et al 2019). Insulin is another understudied hormonal pathway in molluscs despite its  
12 potential functional roles. For instance, in the pond snail *Lymnaea stagnalis*, a decrease of insulin  
13 in the central nervous system correlated with better associative learning behaviour (Totani et al  
14 2019), while insulin-related peptides with potential roles in sexual reproduction have been  
15 identified in the oyster *Crassostrea gigas* (Cherif-Feidel et al 2019). In both *B. straminea* and *B.*  
16 *glabrata* genomes, we were able to identify all key signalling pathway genes (Figure 3C-D,  
17 Supplementary S4). This establishes a foundation on which to further explore the functions of  
18 these hormones in molluscs.

19

### 20 ***Widespread gene turnover between Biomphalaria snails and other molluscs***

21 a) Gene gains and losses in mollusc genomes

1           A phylogenomic tree was constructed using 2,047 orthogroups with at least 12 out of  
2 13 mollusc genomes having single-copy genes in each orthogroup (Supplementary information 6).  
3 Gene family analysis among these genomes revealed the expansion of 1,868 orthogroups and  
4 contraction of 622 orthogroups in *B. straminea*, but in *B. glabrata*, the expansion of 840  
5 orthogroups and contraction of 1,035 orthogroups (Figure 5). This data highlights the importance  
6 of having the *B. straminea* genomic resource, and potentially suggests that specific control  
7 strategies might be needed for *B. straminea* rather than treating it as identical to *B. glabrata*.

8

9           b) Expansion of heat shock protein family among mollusc lineages

10           Heat shock proteins are important stress-responsive candidates involved in protein folding  
11 for molluscs, activated in response to such things as changing pH, oxygen level, and temperature.  
12 In some mollusc genomes, such as that of the Pacific oyster *Crassostrea gigas*, an expansion of  
13 heat shock protein 70 (HSP70) has been observed in the genome and hypothesized to be important  
14 to the animals' adaptation to changes in ambient environmental factors or pressures (Zhang et al  
15 2012). We thus identified the heat shock protein family genes in *Biomphalaria* and compared these  
16 to other lophotrochozoans to understand their evolution in different lineages (Figure 6). Among  
17 the different heat shock protein families in the investigated set of gastropods, bivalves,  
18 cephalopods, annelids, and platyhelminths, a dramatic expansion is seen specifically in the HSP70  
19 family in the bivalve molluscs (Figure 6; Supplementary information S7). Our data and analyses  
20 agree with previous studies (e.g. Zhang et al 2012), suggesting that the expansion of HSP70 is  
21 linked to the life history of molluscs having a sessile stage. This survey also provides the  
22 foundation for future work on the expression and function of particular HSP genes/proteins and

1 their activity in these parasite vectors, which may contribute to their adaptive ability as invasive  
2 species, and possibly contributing to the recent range expansion of *B. straminea*.

3

4 c) Differential sesquiterpenoid and cholesterol genes in certain mollusc lineages

5 Sesquiterpenoid hormones were once considered specific to insects and crustaceans where  
6 they control development and reproduction (Cheong et al 2015; Qu et al 2018; Tsang et al 2020).  
7 However, recent analyses have shown that the sesquiterpenoid system is also present in myriapods,  
8 annelids, and cnidarians (Chipman et al 2014; Qu et al 2015; Schenk et al 2016; Nong et al 2020).  
9 Conversely, vertebrates can only produce cholesterol but not sesquiterpenoids (Tobe and Bendena  
10 1999; Hui et al 2013), and a recent study revealed the canonical cholesterol biosynthesis pathway  
11 in sponges, placozoans and deuterostomes, suggesting cnidarians and protostomes experienced  
12 massive losses of these genes (Zhang et al 2019; Figure 7A). Treatment of *B. straminea* with  $10^{-6}$   
13 M simvastatin and methyl farnesoate changed the expression of sesquiterpenoid pathway genes  
14 HMGCR and FPPS, suggesting a sesquiterpenoid responsive system (Figure 7B-C). Comparison  
15 of sesquiterpenoid pathway genes in mollusc genomes further identified differential utilization of  
16 biogenesis pathways in bivalves and gastropods, where only gastropods but not the bivalves are  
17 able to produce cholesterol similar to vertebrates (Figure 7D-F). This is the first systematic study  
18 showing the differential sesquiterpenoid and cholesterol synthesis pathways possessed by different  
19 mollusc lineages.

20

21

22



1 **Conclusion**

2 This study presents the first high quality genome assembly for a schistosomiasis-transmitting snail  
3 in China and Asia. The snail *Biomphalaria straminea* is important scientifically as well as having  
4 considerable medical relevance. Our work provides gene and transposable element annotations,  
5 and detailed analyses of a variety of gene families, including the homeobox, ecdysteroid, insulin,  
6 heat shock protein, and sesquiterpenoid pathway genes, suggesting extensive molecular  
7 differences between *B. straminea* and *B. glabrata* as well as among other molluscan taxa. More  
8 generally, our high-quality *B. straminea* genome provides a useful reference point for further  
9 understanding of the biology, ecology and evolution of molluscs.

10

11

12

13

14

15

16

17

18

## 1 **Methods**

### 2 *Sample collection and genome sequencing*

3           One week prior to the experiment, approximately 100 ramshorn snails were collected in a  
4 freshwater stream in Tai Po New Territories, Hong Kong (GPS: 22.50206300747975,  
5 114.15354682258841). The collected animals were maintained in a laboratory aquarium and fed  
6 with lettuce three days a week. Samples for genome sequencing originate from single individuals  
7 for each sequencing method (Figure 1A). Genomic DNA (gDNA) was extracted using the  
8 PureLink Genomic DNA Mini Kit (Invitrogen) following the manufacturer's protocol. Extracted  
9 gDNA was subjected to quality control using a Nanodrop spectrophotometer (Thermo Scientific)  
10 and gel electrophoresis. Qualifying samples were sent to Novogene, and Dovetail Genomics for  
11 library preparation and sequencing. The resulting library was sequenced on an Illumina HiSeq X  
12 platform (RRID:SCR\_016385) to produce  $2 \times 150$  paired-end sequences. The length-weighted  
13 mean molecule length is 22.2 kb, and the raw data can be found at NCBI's Small Read Archive  
14 (SRR12963913).

15

### 16 *Dovetail Omni-C library preparation and sequencing*

17           For each Dovetail Omni-C library, chromatin was fixed with formaldehyde and extracted.  
18 Fixed chromatin was digested with DNase I, and chromatin ends were repaired and ligated to a  
19 biotinylated bridge adapter followed by proximity ligation of adapter containing ends. After  
20 proximity ligation, crosslinks were reversed and the DNA was purified. Purified DNA was treated  
21 to remove biotin that was not internal to ligated fragments. Sequencing libraries were generated  
22 using NEBNext Ultra enzymes and Illumina-compatible adapters. Biotin-containing fragments

1 were isolated using streptavidin beads before PCR enrichment of each library. The library was  
2 sequenced on an Illumina HiSeqX platform to produce 128 million 150 bp read pairs, and the raw  
3 data can be found at NCBI's Small Read Archive (SRR12963914).

#### 4 5 ***Transcriptome sequencing***

6 Total RNA from different tissues were isolated using a combination method of  
7 cetyltrimethylammonium bromide (CTAB) pre-treatment (Jordon-Thaden et. al. 2015) and  
8 mirVana™ miRNA Isolation Kit (Ambion) following the manufacturer's protocol. The extracted  
9 total RNA was subjected to quality control using a Nanodrop spectrophotometer (Thermo  
10 Scientific), gel electrophoresis, and an Agilent 2100 Bioanalyzer (Agilent RNA 6000 Nano Kit).  
11 Qualifying samples underwent library construction and sequencing at Novogene; polyA-selected  
12 RNA-Sequencing libraries were prepared using the TruSeq RNA Sample Prep Kit v2. Insert sizes  
13 and library concentrations of final libraries were determined using an Agilent 2100 bioanalyzer  
14 instrument (Agilent DNA 1000 Reagents) and real-time quantitative PCR (TaqMan Probe)  
15 respectively. Details of the sequencing data can be found in Supplementary information S1.

#### 16 17 ***Genome assembly***

18 Chromium WGS reads were used to construct a *de novo* assembly using Supernova (v 2.1.1)  
19 with default parameters (raw coverage = 68.32x). The Supernova output pseudohap assembly and  
20 Dovetail OmniC library reads were used as input data for HiRise, a software pipeline designed  
21 specifically for using proximity ligation data to scaffold genome assemblies (Putnam et al, 2016).  
22 Dovetail OmniC library sequences were aligned to the draft input assembly using bwa

1 (<https://github.com/lh3/bwa>). The separations of Dovetail OmniC read pairs mapped within draft  
2 scaffolds were analyzed by HiRise to produce a likelihood model for genomic distance between  
3 read pairs, and the model was used to identify and break putative misjoins, to score prospective  
4 joins, and make joins above a threshold.

5

## 6 ***Gene model prediction***

7 Gene models were predicted as described in the Hong Kong oyster (*Magallana*  
8 *hongkongensis*) genome (Li et al. 2020). Briefly, the gene models were trained and predicted using  
9 funannotate (v1.7.4,<https://github.com/nextgenusfs/funannotate>) (Palmer & Stajich, 2020) with  
10 the following parameters: “--repeats2evm --protein\_evidence uniprot\_sprot.fasta --  
11 genemark\_mode ET --busco\_seed\_species metazoa --optimize\_augustus --busco\_db metazoa --  
12 organism other --max\_intronlen 350000”. The gene models from several prediction sources  
13 including GeneMark, high-quality Augustus predictions (HiQ), pasa, Augustus, GlimmerHM and  
14 snap were passed to Evidence Modeler and generated the gene model annotation files, followed  
15 by PASA to update the EVM consensus predictions, and add UTR annotations and models for  
16 alternatively spliced isoforms. Protein-coding genes were searched with BLASTp  
17 (RRID:SCR\_001010) against the nr and swissprot databases by diamond (v0.9.24) (Buchfink et  
18 al., 2014) with parameters “--more-sensitive --evaluate 1e-3”, and mapped by HISAT2 (version  
19 2.1.0, RRID:SCR\_015530) with transcriptome reads (Kim et al. 2019). Gene models with no  
20 similarity to any known protein and no mRNA support were removed from the final version.

21

## 22 ***Repetitive elements annotation***

1 Repetitive elements were identified using the transposable element annotation pipeline  
2 earlGrey (Baril et al 2021) as follows. Firstly, elements were identified using RepeatMasker v.4.1  
3 (RRID:SCR\_012954) (Smit et al., 2013), using a sensitive (-s) search and ignoring low-complexity  
4 repeats (-nolow). Subsequently, a *de novo* repeat library was constructed using RepeatModeler  
5 v.1.0.11 (RRID:SCR\_015027)(Smit et al., 2015), including RECON v.1.08 (RRID:SCR\_021170)  
6 (Bao., et al 2002) and RepeatScout v.1.0.5 (RRID:SCR\_014653)(Price et al., 2005). Identified  
7 novel repeats were analysed using a ‘BLAST, Extract, Extend’ process to characterise elements  
8 along their entire length (Platt et al., 2016); Consensus sequences and classifications for each  
9 repeat family were generated, and the resulting *de novo* repeat library was utilised to identify  
10 repetitive elements in RepeatMasker. All plots were generated using Rstudio ver. 1.2.1335 with R  
11 ver. 3.5.1 (Team, 2013) and ggplot2 ver. 3.2.1 (ggplot2, RRID:SCR\_014601)(Wickham, 2016).

12

### 13 ***Gene family annotation and gene tree building***

14 Gene family sequences were first obtained from NCBI for selected species, including *B.*  
15 *glabrata* and other lophotrochozoans. The sequences were then used to retrieve the corresponding  
16 genes from the *B. straminea* genome using the tBLASTn algorithm on a local server, with an E-  
17 value of less than  $10^{-3}$ . The identity of each retrieved gene was then checked by reciprocal searches  
18 against the Genbank nr database at NCBI with BLASTx. For phylogenetic analyses of gene  
19 families, DNA sequences were first translated into amino-acid sequences and aligned to other  
20 reference sequences (extracted from NCBI) using Clustal W. Gapped sites were removed from  
21 alignments using MEGA 7.0 (RRID:SCR\_000667), and phylogenetic trees (neighbor-joining)  
22 were constructed using MEGA 7.0, where each phylogenetic node was analysed using 1000  
23 bootstrap replicates. For homeobox-containing genes, homeodomains were annotated using

1 tBLASTn searches with HomeoDB sequences, and sequences from representative  
2 lophotrochozoan families, including the expanded Spiralia TALEs (Barton-Owen et al., 2018). We  
3 also removed redundant hits based on their unique locations in the genome sequence, and manually  
4 detected any likely artefactual duplicates which were not carried forward into the protein  
5 sequences alignments (Supplementary Table S2). Alignments of each class were made using  
6 MUSCLE (RRID:SCR\_011812)(Edgar, 2004), with homeodomain sequences from human (*Homo*  
7 *sapiens*, deuterostome), amphioxus (*Branchiostoma floridae*, a cephalochordate deuterostome),  
8 the ecdysozoans fruitfly (*Drosophila melanogaster*), and red flour beetle (*Tribolium castaneum*),  
9 and the lophotrochozoans oyster (*Crassostrea gigas*, bivalve), limpet (*Lottia gigantea*, gastropod),  
10 brachiopod (*Lingula anatina*), and annelids *Platynereis dumerilii* and *Capitella teleta*, where  
11 available from other studies (Paps et al., 2015; Barton-Owen et al., 2018) and HomeoDB (Ying-  
12 Fu et al., 2011; 2008). The best substitution models were tested with ModelFinder, and Maximum  
13 Likelihood phylogenies were constructed with IQ-TREE (RRID:SCR\_017254) with 1000  
14 bootstrap replicates (Nguyen et al., 2015).

15

### 16 ***Identification of orthologous genes and gene families***

17 Orthologues and orthogroups in *B. straminea* and 12 other animal proteomes were inferred  
18 using OrthoFinder (v. 2.5.2, RRID:SCR\_017118) (Emms DM & Kelly, 2019) with default values  
19 and ‘-M msa’ activated. To cover the gene families, the longest protein of each gene was taken as  
20 the representative in OrthoFinder analysis. Gene duplication events were then identified.  
21 Duplication ratios per node/tip were calculated by dividing the number of duplications observed  
22 in each node/tip by the total number of gene trees containing that node. CAFE5 was used to infer  
23 gene gain and loss rates [29]. Orthogroups from output of OrthoFinder were regarded as gene

1 families and fed to CAFE5. A divergence tree was inferred using r8s [30] from the species tree  
2 generated by OrthoFinder. We tested several gamma rate categories (-k) and k=1 showed the best  
3 likelihood.

4

#### 5 ***Functional terms enrichment analysis***

6 Orthogroups were assigned Gene Ontology (GO), EuKaryotic Orthologous Groups  
7 (KOG), Kyoto Encyclopedia of Genes and Genomes (KEGG), and KEGG Orthology (KO) terms  
8 by inheriting the terms from genes found within the groups. The functional term annotations were  
9 performed using eggNOG (RRID:SCR\_002456)(Jensen et al. 2008) . Functional enrichment was  
10 tested for using function ‘compareCluster()’ in R package ‘clusterProfiler’ v.3.16.1 (Yu et al.  
11 2012) under the environment of R 4.0.4 [33]. Significantly enriched terms were determined with  
12  $pvalueCutoff = 0.05$ ,  $pAdjustMethod = "BH"$ , and  $qvalueCutoff = 0.2$ . Data was visualised using  
13 R packages ‘ggplot2’ (Wickham, 2016), ‘ggtree’ (Yu et al. 2017) and ‘pathview’(Luo & Brouwer,  
14 2013).

1  
2  
3  
4  
5  
6  
7  
8  
9  
10  
11  
12  
13  
14  
15  
16  
17  
18  
19  
20  
21

***Macrosynteny analysis***

Single-copy orthologues anchored by mutual best Diamond blastp v0.9.14.115[17] hits (evaluate 0.001) between *B. straminea* and 12 other animals with chromosome-level or near chromosome-level assemblies were used in macrosynteny analysis. Oxford synteny plots were generated following previously described methods [36] using R packages ‘ggplot2’ (Wickham, 2016).

***Drug and hormone treatment and RT-qPCR***

Experimental adult animals of ~1cm with reproductive capability were isolated from the culture and were rinsed in double-distilled water to remove any contaminants. Three individuals per set were placed in a glass container, with a well of 3.5cm in diameter and 0.8cm in depth, filled with 2ml of double-distilled water with either 10<sup>-6</sup>M or 10<sup>-8</sup>M of methyl farnesoate (MF) (Sigma), 6x10<sup>-5</sup>M of simvastatin (Sigma) or 10<sup>-6</sup>M of 20-hydroxyecdysone (AbcamBiochemicals) in separate setups. The chemicals were first dissolved in acetone and diluted to the target concentration in the treatment container. The control setup contained the same number of individuals and was treated with the same concentration of acetone in corresponding experiments. Each replicate of snails was exposed for 24 hours to these treatments without any feeding. Post-treated animals were rinsed with double-distilled water and shells were removed prior to whole body total RNA extraction. The RNA from each experiment was isolated using TRIzol reagent following the manufacturer's protocol. Purified RNA was dissolved in nuclease-free water. The



1 cDNA synthesis was performed using the iScript gDNA Clear cDNA Synthesis Kit (BioRad)  
2 following the manufacturer's protocol. The cDNA was used in subsequent quantitative real time  
3 PCR. The amplification conditions were as follows: initial denaturation at 95 °C for 30 s, followed  
4 by 40 cycles of 95 °C denaturation for 15s, 57 °C primer annealing for 15s and 72°C extension for  
5 15s. Primer details are listed in Supplementary File S8. The primers were tested by conventional  
6 PCR with *B. straminea* cDNA prior to experiments to ensure their specificity. Each sample was  
7 analyzed in replicates. The expression of each target gene transcript was normalized to the  
8 housekeeping gene, myoglobin (Myo), as adopted in previous studies (Jiang et al 2006; Arican-  
9 Goktas et al 2014; Queiroz et al 2017; Pinaud et al 2021). The subsequent fold induction analyses  
10 were calculated using the  $\Delta\Delta C_t$  method.

11

12

### 13 **Ethics Statement**

14 N/A

15

### 16 **Data Availability**

17 The raw genome and RNA sequencing data have been deposited in the SRA under Bioproject  
18 number PRJNA673593. The final chromosome assembly was submitted to NCBI Assembly under  
19 accession number JADKLZ000000000 in NCBI. All data can also be found in the GigaScience  
20 Database (Nong et al 2022).

1  
2  
3  
4  
5  
6  
7  
8  
9

10 **Figure legends**

11 **Figure 1.** A) Life cycle of snail *Biomphalaria straminea*; B) Comparison of snail *Biomphalaria*  
12 genome assembly quality; C) Transposable elements in *Biomphalaria straminea*.

13 **Figure 2.** Distribution of Homeoboxes in the genome of *Biomphalaria straminea*. Class is denoted  
14 by colour, arrows show orientation on each scaffold, which are represented by black lines and are  
15 numbered underneath. *Post2* is not found in the genomic sequence but is found in the  
16 transcriptome, so is not shown on a scaffold. Grey gene names and box outlines denote partial  
17 homeodomain sequences.

1 **Figure 3.** A) Schematic diagram of biosynthetic pathway of ecdysteroids; B) Presence and absence  
2 of ecdysteroid pathway genes in *B. straminea*; C) Schematic diagram of biosynthetic pathway of  
3 insulin; E) Number of gene copies of insulin pathway genes in *B. straminea*.

4 **Figure 4.** Synteny between *B. straminea* and 12 mollusc genomes. The species tree is constructed  
5 using 2,047 orthogroups with at least 12 out of 13 mollusc genomes having single-copy genes in  
6 each orthogroup. In the Oxford dot plot, each dot represents a pair of orthologous genes between  
7 *B. straminea* and the specific mollusc. Horizontal and vertical dashed lines represent chromosome  
8 or scaffold boundaries. Orthologous genes are colored according to their position in *B. straminea*  
9 scaffolds. Significance of synteny blocks is computed using one-tailed Fisher's exact test, and the  
10 color of synteny blocks with Benjamini & Hochberg corrected p over 0.05 are turned into grey.

11 **Figure 5.** Summaries of gene families in *B. straminea* and 12 molluscs. A) Gene family clustering,  
12 only the longest isoform for each gene was used; B) Gene family expansion and contraction  
13 between mollusc genomes. Brown and green color indicate the number of significantly ( $p < 0.05$ )  
14 expanded or contracted gene families at each node, respectively.

15 **Figure 6.** A) Schematic diagram showing the heat shock protein actions; B) Number of gene copies  
16 of heat shock proteins in different mollusc genomes.

17 **Figure 7.** A) Schematic diagram showing the mevalonate pathway, and the downstream  
18 sesquiterpenoid and *de novo* cholesterol synthesis pathways. B) Expression of genes upon  $6 \times 10^{-5}$   
19 M simvastatin,  $10^{-6}$ M and  $10^{-8}$ M methyl farnesoate treatment for 24 hours; \* =  $p < 0.05$ . C)  
20 Heatmap of mevalonate pathway orthologues identified in gastropod and bivalve genomes. D)  
21 Heatmap of sesquiterpenoid synthesis pathway orthologues identified in gastropod and bivalve

1 genomes. E) Heatmap of *de novo* cholesterol synthesis pathway orthologues identified in  
2 gastropod and bivalve genomes. F) Schematic diagram showing the evolution of sesquiterpenoid  
3 pathway genes in bilaterians.

4

5 **Additional Files.**

6 **Supplementary information S1.** Sequencing data.

7 **Supplementary information S2.** a) Tables of homeobox genes sequences in *B. straminea*, *B.*  
8 *glabrata*, a synteny comparison of homeobox genes, and comparison of ParaHox gene linkage. b)  
9 Distribution of Homeoboxes in the genome of *Biomphalaria glabrata*. c) Alignments and  
10 phylogenies of each class of Homeobox sequences.

11 **Supplementary information S3.** Ecdysteroid genes.

12 **Supplementary information S4.** Insulin pathway genes.

13 **Supplementary information S5.** Synteny information

14 **Supplementary information S6.** Gene expansion and contraction.

15 **Supplementary information S7.** Heat shock protein family genes.

16 **Supplementary information S8.** Cholesterol genes and primers.

17 **Supplementary information S9.** Phylogenetic trees.

1 **Supplementary information S10.** Tables.

2 **Abbreviations.**

3 BLAST: Basic Local Alignment Search Tool; BUSCO: Benchmarking Universal Single-Copy  
4 Orthologs; kb: kilobase pairs; Mb: megabase pairs; NCBI: National Center for Biotechnology  
5 Information; TE: transposable element

6

7 **Competing Interests**

8 The authors declare that they have no competing interests.

9

10 **Funding**

11 This work was supported by the Hong Kong Research Grant Council Collaborative Research Fund  
12 (C4015-20EF), General Research Fund (14100919), NSFC/RGC Joint Research Scheme  
13 (N\_CUHK401/21), and The Chinese University of Hong Kong Direct Grant (4053433, 4053489).  
14 YY, WLS, CFW, STSL, and YL were supported by the PhD studentships of The Chinese  
15 University of Hong Kong. AH is supported by a Biotechnology and Biological Sciences Research  
16 Council (BBSRC) David Phillips Fellowship (BB/N020146/1). TB is supported by a studentship  
17 from the Biotechnology and Biological Sciences Research Council-funded South West  
18 Biosciences Doctoral Training Partnership (BB/M009122/1). MEAR is supported by a PhD  
19 studentship from the School of Biology and St Andrews University.

1  
2  
3  
4  
5  
6  
7  
8  
9  
10  
11  
12  
13  
14  
15  
16  
17  
18  
19

**Authors' Contributions**

JHLH, DEKF, AH, ZW, SX, ZPK, SSC conceived the study. JHLH, DEKF, AH supervised the study. WN, JH, TS assembled the genome. WN carried out the gene model prediction and comparison. YY carried out the heat shock proteins analyses. YX carried out the gene gain and loss and synteny analyses. WLS and CFW carried out the sesquiterpenoid analyses. YY, WLS and SYL carried out the ecdysteroid analyses. MEAR and YL carried out the homeobox gene analyses. TB carried out the transposable element analyses. STSL carried out the insulin analyses. WN, YY, YX, WLS, MEAR, TB, AH, DEKF, JHLH wrote the first draft of manuscript. All authors approved the final version of the manuscript.

**Acknowledgements**

The authors would like to thank Elaine Huang and Ho Yin Yip for collection and maintenance of snails. We thank Thomas Barton-Owen for help and advice on homeobox searches. The authors would also like to thank comments from the anonymous reviewers in improving the manuscript.

1  
2  
3  
4  
5  
6  
7  
8  
9  
10  
11  
12  
13  
14  
15  
16  
17  
18  
19  
20  
21  
22

**References**

Acker MJ, Habib MR, Beach GA, et al.. An immunohistochemical analysis of peptidergic neurons apparently associated with reproduction and growth in *Biomphalaria alexandrina*. *Gen Comp Endocrinol*. 2019;280:1-8.

Adema CM, Hillier LDW, Jones CS, et al.. Whole genome analysis of a schistosomiasis-transmitting freshwater snail. *Nat Commun*; 2017;8:1-12.

Altschul SF, Gish W, Miller W, et al.. Basic local alignment search tool. *J Mol Biol*. 1990;215:403-410.

Arican-Goktas HD, Ittiprasert W, Bridger JM. et al.. Differential spatial repositioning of activated genes in *Biomphalaria glabrata* snails infected with *Schistosoma mansoni*. *PLoS neglected tropical diseases*. 2014;8: e3013.

- 1 Attwood SW, Huo GN & Qiu JW. Update on the distribution and phylogenetics of *Biomphalaria*  
2 (Gastropoda: Planorbidae) populations in Guangdong Province, China. *Acta tropica*.  
3 2015;141: 258-270.
- 4 Bao Z & Eddy SR. Automated *De Novo* Identification of Repeat Sequence Families in Sequenced  
5 Genomes. *Genome research*. 2002;12:1269-1276.
- 6 Baril T, Imrie R & Hayward A. Earl Grey. Zenodo. 2021. doi:10.5281/zenodo.5654616
- 7 Barton-Owen TB., Szabó R, Somorjai IML, et al.. A revised spiralian homeobox gene  
8 classification incorporating new polychaete transcriptomes reveals a diverse TALE class and  
9 a divergent hox gene. *Genome Biol. Evol.* 2018;10:2151-2167.
- 10 Bayne CJ. On the reported occurrence of an ecdysone-like steroid in the freshwater snail,  
11 *Biomphalaria glabrata* (Pulmonata; Basommatophora), intermediate host of *Schistosoma*  
12 *mansoni*. *Parasitology*. 1972;64:501-509.
- 13 Buchfink B, Xie C & Huson DH. Fast and sensitive protein alignment using DIAMOND. Nat  
14 Methods 2014 121. *Nature methods*. 2015;12:59-60.
- 15 Butts T, Holland PWH & Ferrier DEK. The Urbilaterian Super-Hox cluster. *Trends Genet*.  
16 2008;24:259-262.
- 17 Campbell G, Jones CS, Lockyer AE, et al.. Molecular evidence supports an African affinity of the  
18 Neotropical freshwater gastropod, *Biomphalaria glabrata*, Say 1818, an intermediate host  
19 for *Schistosoma mansoni*. *Proc R Soc B Biol Sci. Royal Society*. 2000;267:2351-2358.
- 20 Castro LFC & Holland PWH. Chromosomal mapping of ANTP class homeobox genes in  
21 amphioxus: piecing together ancestral genomes. *Evol. Dev.* 2003;5:459-465.
- 22 Cheong SPS, Huang J, Bendena WG, et al.. Evolution of ecdysis and metamorphosis in arthropods:  
23 The rise of regulation of juvenile hormone. *Integr Comp Biol*. 2015;55: 878-890.
- 24 Cherif—Feildel M, Heude Berthelin C, Adeline B, et al.. Molecular evolution and functional  
25 characterisation of insulin related peptides in molluscs: Contributions of *Crassostrea gigas*  
26 genomic and transcriptomic-wide screening. *Gen Comp Endocrinol*. 2019;271:15-29.
- 27 Chipman AD, Ferrier DEK, Brena C, et al.. The First Myriapod Genome Sequence Reveals  
28 Conservative Arthropod Gene Content and Genome Organisation in the Centipede *Strigamia*  
29 *maritima*. *PLoS Biol*. 2014;12:e1002005.
- 30 Chourrout D, Delsuc F, Chourrout P, et al.. Minimal ProtoHox cluster inferred from bilaterian and  
31 cnidarian Hox complements. *Nature*. 2006;442:684-687.
- 32 DeJong RJ, Morgan JA, Paraense WL, et al.. Evolutionary relationships and biogeography of  
33 *Biomphalaria* (Gastropoda: Planorbidae) with implications regarding its role as host of the  
34 human bloodfluke, *Schistosoma mansoni*. *Mol. Biol. Evol.*. 2001;18:2225-2239.



- 1 Dudgeon D & Yipp MW. A report on the gastropod fauna of aquarium fish farms in Hong Kong,  
2 with special reference to an introduced human schistosome host species, *Biomphalaria*  
3 *straminea* (Pulmonata: Planorbidae). *Malacol Rev.* 1983;16:93-94.
- 4 Edgar RC. MUSCLE: Multiple sequence alignment with high accuracy and high throughput.  
5 *Nucleic Acids Res.* 2004;32:1792-1797.
- 6 Emms DM & Kelly S. OrthoFinder: Phylogenetic orthology inference for comparative genomics.  
7 *Genome Biol.* 2019;20:1-14.
- 8 Ferrier DEK. Evolution of Homeobox Gene Clusters in Animals: The Giga-Cluster and Primary  
9 vs. Secondary Clustering. *Front. Ecol. Evol.* 2016;4:1-13.
- 10 Hossain MS, Liu Y, Zhou S, et al.. 20-Hydroxyecdysone-induced transcriptional activity of FoxO  
11 upregulates brummer and acid lipase-1 and promotes lipolysis in *Bombyx* fat body. *Insect*  
12 *biochemistry and molecular biology.* 2013;43:829-838.
- 13 Huerta-Cepas J, Szklarczyk D, Heller D, et al.. eggNOG 5.0: a hierarchical, functionally and  
14 phylogenetically annotated orthology resource based on 5090 organisms and 2502 viruses.  
15 *Nucleic acids research.* 2019;47:309-314.
- 16 Hui JHL, Bendena WG & Tobe SS. Future perspectives for research on the biosynthesis of juvenile  
17 hormones and related sesquiterpenoids in arthropod endocrinology and ecotoxicology. *Juv*  
18 *Horm Juvenoids Model Biol Eff Environ Fate.* CRC Press, Boca Raton, 15-30, 2013.
- 19 Hui JHL, McDougall C, Monteiro AS, et al.. Extensive chordate and annelid macrosynteny reveals  
20 ancestral homeobox gene organization. *Mol. Biol. Evol.* 2012;29:157-165.
- 21 Ikuta T, Chen YC, Annunziata R, et al.. Identification of an intact ParaHox cluster with temporal  
22 colinearity but altered spatial colinearity in the hemichordate *Ptychodera flava*. *BMC Evol.*  
23 *Biol.*, 2013;13:1-10.
- 24 Irimia M, Maeso I, & Garcia-Fernandez J. Convergent Evolution of Clustering of Iroquois  
25 Homeobox Genes across Metazoans. *Mol. Biol. Evol.* 2008;25:1521-1525.
- 26 Jensen LJ, Julien P, Kuhn M, von Mering C, Muller J, Doerks T, Bork P. eggNOG: automated  
27 construction and annotation of orthologous groups of genes. *Nucleic Acids Res.* 2008  
28 Jan;36(Database issue):D250-4. doi: 10.1093/nar/gkm796.
- 29 Ji C, Zhang N, Jiang H, et al.. 20-hydroxyecdysone regulates expression of methioninesulfoxide  
30 reductases through transcription factor FOXO in the red flour beetle, *Tribolium castaneum*.  
31 *Insect Biochemistry and Molecular Biology*, 2021;131:103546.
- 32 Jiang Y, Loker ES & Zhang SM. *In vivo* and *in vitro* knockdown of FREP2 gene expression in the  
33 snail *Biomphalaria glabrata* using RNA interference. *Developmental & Comparative*  
34 *Immunology.* 2006;30: 855-866.

1 Jordon-Thaden IE, Chanderbali AS, Gitzendanner MA, et al.. Modified CTAB and TRIzol  
2 Protocols Improve RNA Extraction from Chemically Complex Embryophyta. *Appl Plant*  
3 *Sci.* 2015;3.

4 Kerner P, Ikmi A, Coen D, et al.. Evolutionary history of the iroquois/Irx genes in metazoans.  
5 *BMC Evol. Biol.* 2009;9:1–14.

6 Kim D, Paggi JM, Park C, et al.. Graph-based genome alignment and genotyping with HISAT2  
7 and HISAT-genotype. *Nature biotechnology.* 2019;37:907-915.

8 Kumar S, Stecher G & Tamura K. MEGA7: Molecular Evolutionary Genetics Analysis Version  
9 7.0 for Bigger Datasets. *Mol Biol Evol.* 2016;33: 1870-1874.

10 Li H & Durbin R. Fast and accurate short read alignment with Burrows-Wheeler transform.  
11 *Bioinformatics.* 2009;25:1754-1760.

12 Li Y, Nong W, Baril T, et al.. Reconstruction of ancient homeobox gene linkages inferred from a  
13 new high-quality assembly of the Hong Kong oyster (*Magallana hongkongensis*) genome.  
14 *BMC Genomics.* 2020;21:1-17.

15 Luo W & Brouwer C. Pathview: An R/Bioconductor package for pathway-based data integration  
16 and visualization. *Bioinformatics.* 2013;29:1830-1831.

17 Mazza ME, Pang K, Reitzel AM, et al.. A conserved cluster of three PRD-class homeobox genes  
18 (homeobrain, rx and orthopedia) in the Cnidaria and Protostomia. *Evodevo.* 2010;1:3.

19 Meier-Brook C. A snail intermediate host of *Schistosoma mansoni* introduced into Hong Kong.  
20 *Bull World Health Organ.* 1974;51:661.

21 Mendes FK, Vanderpool D, Fulton B, e al.. CAFE 5 models variation in evolutionary rates among  
22 gene families. Robinson P, editor. *Bioinformatics.* Oxford University Press (OUP); 2020.

23 Nguyen L-T, Schmidt HA, von Haeseler A, et al.. IQ-TREE: A Fast and Effective Stochastic  
24 Algorithm for Estimating Maximum-Likelihood Phylogenies. *Mol. Biol. Evol.* 2015;32:268-  
25 274.

26 Nong W, Cao J, Li Y, et al.. Jellyfish genomes reveal distinct homeobox gene clusters and  
27 conservation of small RNA processing. *Nat Commun.* 2020;11:1-11.

28 Nong W; Yu Y; Aase-Remedios ME; Xie Y; So WL; Li Y; Wong CF; Baril T; S Law ST; Lai SY;  
29 Haimovitz J; Swale T; Chen S; Kai Z; Xi S; Wu Z; Hayward A; K Ferrier DE; L Hui JH  
30 (2022): Supporting data for "Genome of the ramshorn snail *Biomphalaria straminea* - an  
31 obligate intermediate host of schistosomiasis" GigaScience  
32 Database. <http://doi.org/10.5524/100985>

33 Osborne PW, Benoit G, Laudet V, et al.. Differential regulation of ParaHox genes by retinoic acid  
34 in the invertebrate chordate amphioxus (*Branchiostoma floridae*). *Developmental Biology.*  
35 2009;327:252-262.

- 1 Palmer JM & Stajich J. (2020). nextgenusfs/funannotate: funannotate v1.7.4 (1.7.4). Zenodo.  
2 <https://doi.org/10.5281/zenodo.3679386>
- 3 Paps J, Xu F, Zhang G, et al.. Reinforcing the egg-timer: Recruitment of novel Lophotrochozoa  
4 homeobox genes to early and late development in the Pacific oyster. *Genome Biol. Evol.*  
5 2015;7:677-688.
- 6 Pinaud S, Tetreau G, Poteaux P, et al.. New insights into biomphalysin gene family diversification  
7 in the vector snail *Biomphalaria glabrata*. *Frontiers in immunology*. 2021;12:918.
- 8 Platt RN, Blanco-Berdugo L & Ray DA. Accurate transposable element annotation is vital when  
9 analyzing new genome assemblies. *Genome Biol Evol.* 2016;8:403-410.
- 10 Price AL, Jones NC & Pevzner PA. *De novo* identification of repeat families in large genomes.  
11 *Bioinformatics*. 2005;21:351-358.
- 12 Putnam NH, Connell BO, Stites JC, et al.. Chromosome-scale shotgun assembly using an *in vitro*  
13 method for long-range linkage. *Genome research*. 2016;26:342-350.
- 14 Qu Z, Bendena WG, Tobe SS, et al.. Juvenile hormone and sesquiterpenoids in arthropods:  
15 Biosynthesis, signaling, and role of MicroRNA. *J. Steroid Biochem. Mol. Biol.* 2018;184:69-  
16 76.
- 17 Qu Z, Kenny NJ, Lam HM, et al.. How Did Arthropod Sesquiterpenoids and Ecdysteroids Arise?  
18 Comparison of Hormonal Pathway Genes in Noninsect Arthropod Genomes. *Genome Biol*  
19 *Evol.* 2015;7:1951-1959.
- 20 Queiroz FR, Silva LM, Jeremias WDJ, et al.. Differential expression of small RNA pathway genes  
21 associated with the *Biomphalaria glabrata*/*Schistosoma mansoni* interaction. *PLoS one*.  
22 2017;12: e0181483
- 23 R Core Team. R: a language and environment for statistical computing. Vienna, Austria; 2013.
- 24 Sanderson MJ. r8s: Inferring absolute rates of molecular evolution and divergence times in the  
25 absence of a molecular clock. *Bioinformatics*. Oxford Academic; 2003.
- 26 Schenk S, Krauditsch C, Frühauf P, et al.. Discovery of methylfarnesoate as the annelid brain  
27 hormone reveals an ancient role of sesquiterpenoids in reproduction. *Elife*. 2016;5:e17126.
- 28 Sekimoto T, Iwami M & Sakurai S. 20- Hydroxyecdysone regulation of two isoforms of the Ets  
29 transcription factor E74 gene in programmed cell death in the silkworm anterior silk gland.  
30 *Insect molecular biology*. 2007;16:581-590.
- 31 Shiff CJ & Dossaji SF. Ecdysteroids as regulators of host and parasite interactions: a study of  
32 interrelationships between *Schistosoma mansoni* and the host snail, *Biomphalaria glabrata*.  
33 *Trop Med Parasitol.* 1991;42:11-6.
- 34 Simakov O, Marlétaz F, Cho S-J, et al.. Insights into bilaterian evolution from three spiralian  
35 genomes. *Nature*. 2013;493:526-531.

- 1 Simakov O, Marlétaz F, Yue JX, et al.. Deeply conserved synteny resolves early events in  
2 vertebrate evolution. *Nat Ecol Evol.* 2020;4:820-830.
- 3 Simão FA, Waterhouse RM, Ioannidis P, et al.. BUSCO: Assessing genome assembly and  
4 annotation completeness with single-copy orthologs. *Bioinformatics.* 2015;31:3210-3212.
- 5 Smit A & Hubley R. RepeatModeler Open-1.0. <http://repeatmasker.org>. 2015.
- 6 Smit AFA, Hubley RR & Green PR. RepeatMasker Open-4.0. <http://repeatmasker.org>. 2015.
- 7 Smith SA, Wilson NG, Goetz FE, et al.. Resolving the evolutionary relationships of molluscs with  
8 phylogenomic tools. *Nature.* 2011;480:364-367.
- 9 Takatori N, Butts T, Candiani S, et al.. Comprehensive survey and classification of homeobox  
10 genes in the genome of amphioxus, *Branchiostoma floridae*. *Dev. Genes Evol.*  
11 2008;218:579-590.
- 12 Team RC. R: A language and environment for statistical computing. Vienna, Austria; 2013.
- 13 Tennessen JA, Bollmann SR, Peremyslova E, et al.. Clusters of polymorphic transmembrane genes  
14 control resistance to schistosomes in snail vectors. *Elife.* 2020.
- 15 Tobe SS & Bendena WG. The regulation of juvenile hormone production in arthropods. Functional  
16 and evolutionary perspectives. *Ann N Y Acad Sci.* 1999;897:300-310.
- 17 Totani Y, Aonuma H, Oike A, et al.. Monoamines, insulin and the roles they play in associative  
18 learning in pond snails. *Front. Behav. Neurosci.* 2019;13:65.
- 19 Tsang SSK, Law STS, Li C, et al.. Diversity of Insect Sesquiterpenoid Regulation. *Front. Genet.*  
20 2020;11:1027.
- 21 Wang L, Wu X, Li X, et al.. Imported Schistosomiasis: A New Public Health Challenge for China.  
22 *Front Med.* 2020;7.
- 23 Wickham H. ggplot2: Elegant graphics for data analysis. New York: Springer-Verlag. 2019.  
24 <https://doi.org/10.1007/978-0-387-98141-3>
- 25 Woodruff DS, Mulvey M & Yipp MW. The continued introduction of intermediate host snails to  
26 *Schistosoma mansoni* into Hong Kong. *Bull World Heal Organ.* 1985;63:621.
- 27 Yang Y, Cheng W, Wu X, et al.. Prediction of the potential global distribution for *Biomphalaria*  
28 *straminea*, an intermediate host for *Schistosoma mansoni*. *PLOS Negl Trop Dis.*  
29 2018;12:e0006548
- 30 Yu G, Smith DK, Zhu H, et al.. ggtree: an r package for visualization and annotation of  
31 phylogenetic trees with their covariates and other associated data. *Methods Ecol Evol.*  
32 2017;8:28-36.
- 33 Yu G, Wang L-G, Han Y, et al.. clusterProfiler: an R package for comparing biological themes  
34 among gene clusters. *Omics: a journal of integrative biology.* 2012;16:284-287.

- 1 Zeng X, Yiu WC, Cheung KH, et al.. Distribution and current infection status of *Biomphalaria*  
2 *straminea* in Hong Kong. 2017;10:1-12
- 3 Zhang G, Fang X, Guo X, et al.. The oyster genome reveals stress adaptation and complexity of  
4 shell formation. *Nature*. 2012;490:49-54.
- 5 Zhang H, Ravi V, Tay BH, et al.. Lampreys, the jawless vertebrates, contain only two ParaHox  
6 gene clusters. *PNAS*. 2017;114: 9146-9151.
- 7 Zhang T, Yuan D, Xie J, et al.. Evolution of the Cholesterol Biosynthesis Pathway in Animals.  
8 *Mol Biol Evol*. 2019;36:2548-2556.
- 9 Zhong Y & Holland PWH. HomeoDB2: functional expansion of a comparative homeobox gene  
10 database for evolutionary developmental biology. *Evol. Dev*. 2011;13:567–568.
- 11 Zhong Y-F, Butts T, & Holland PWH. HomeoDB: a database of homeobox gene diversity. *Evol.*  
12 *Dev*. 2008;10:516-518.
- 13 Zhu R & Xu J. Epidemic situation of oversea imported schistosomiasis in China and thinking about  
14 its prevention and control. *Chinese journal of schistosomiasis control*. 2014;26:111-114.

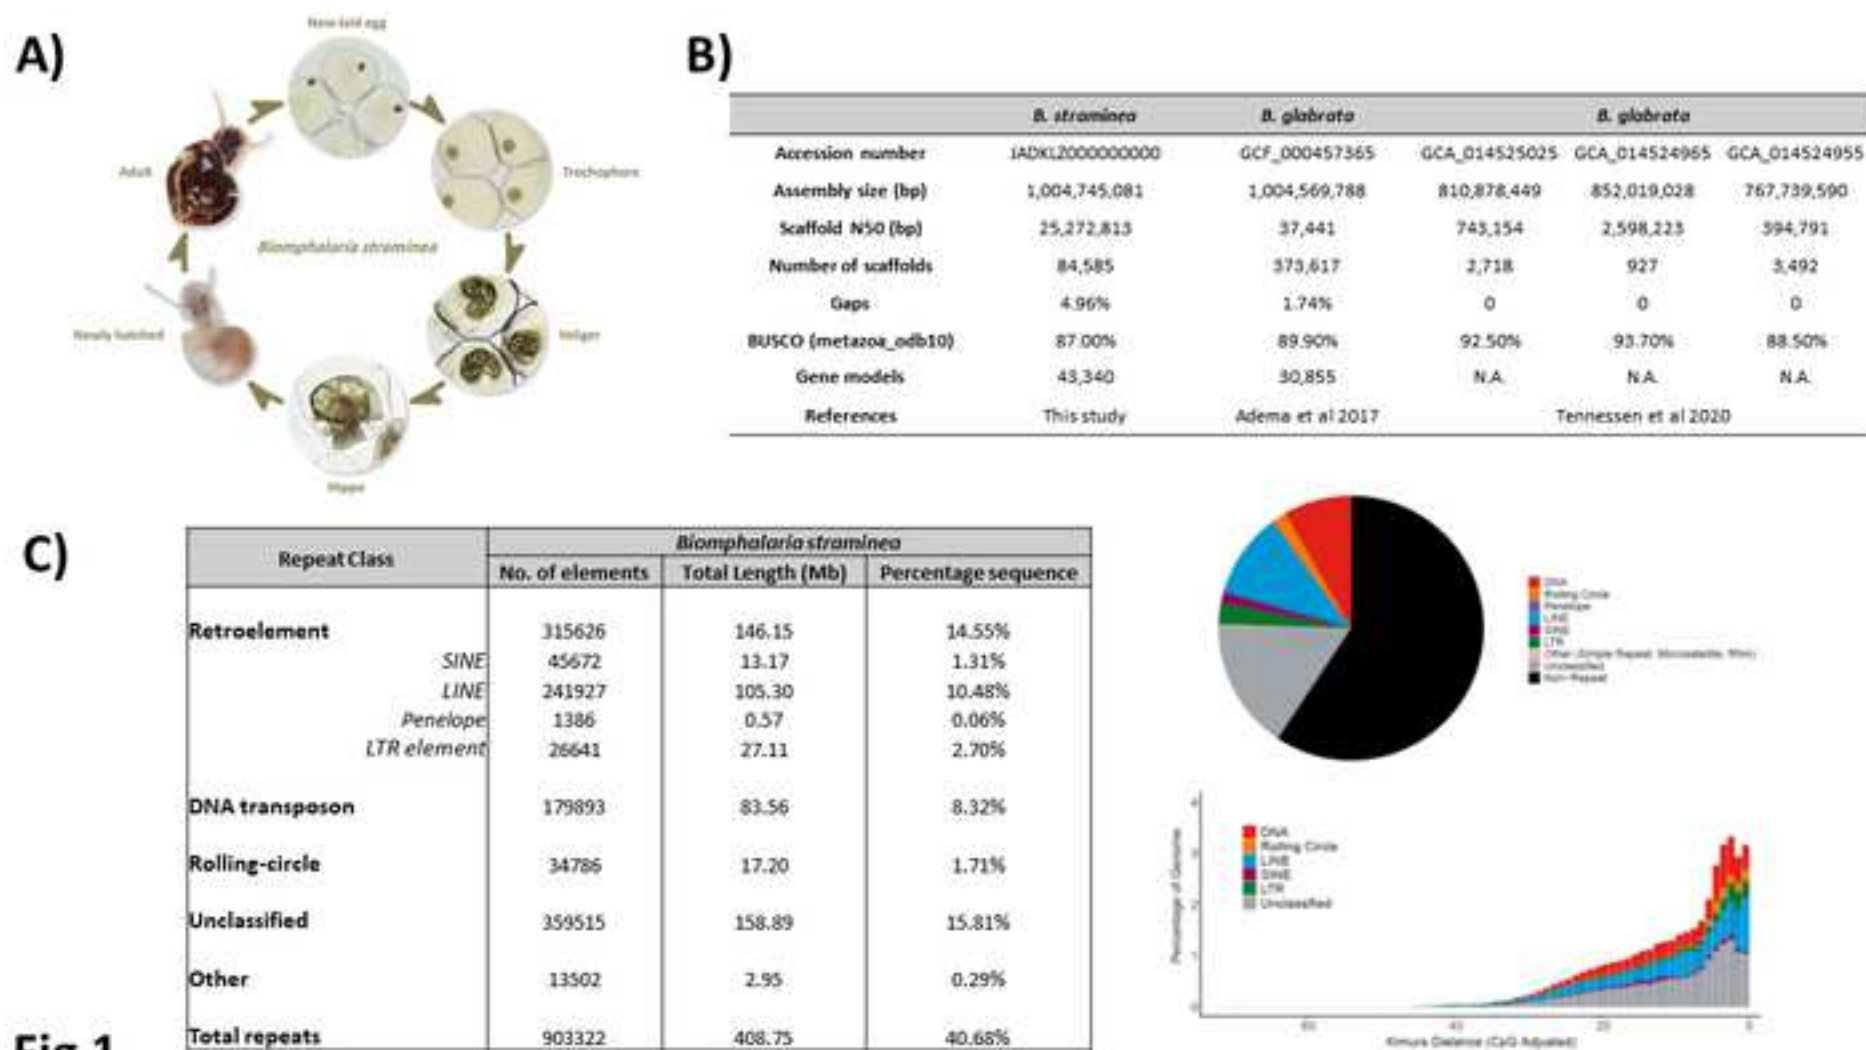

Fig 1

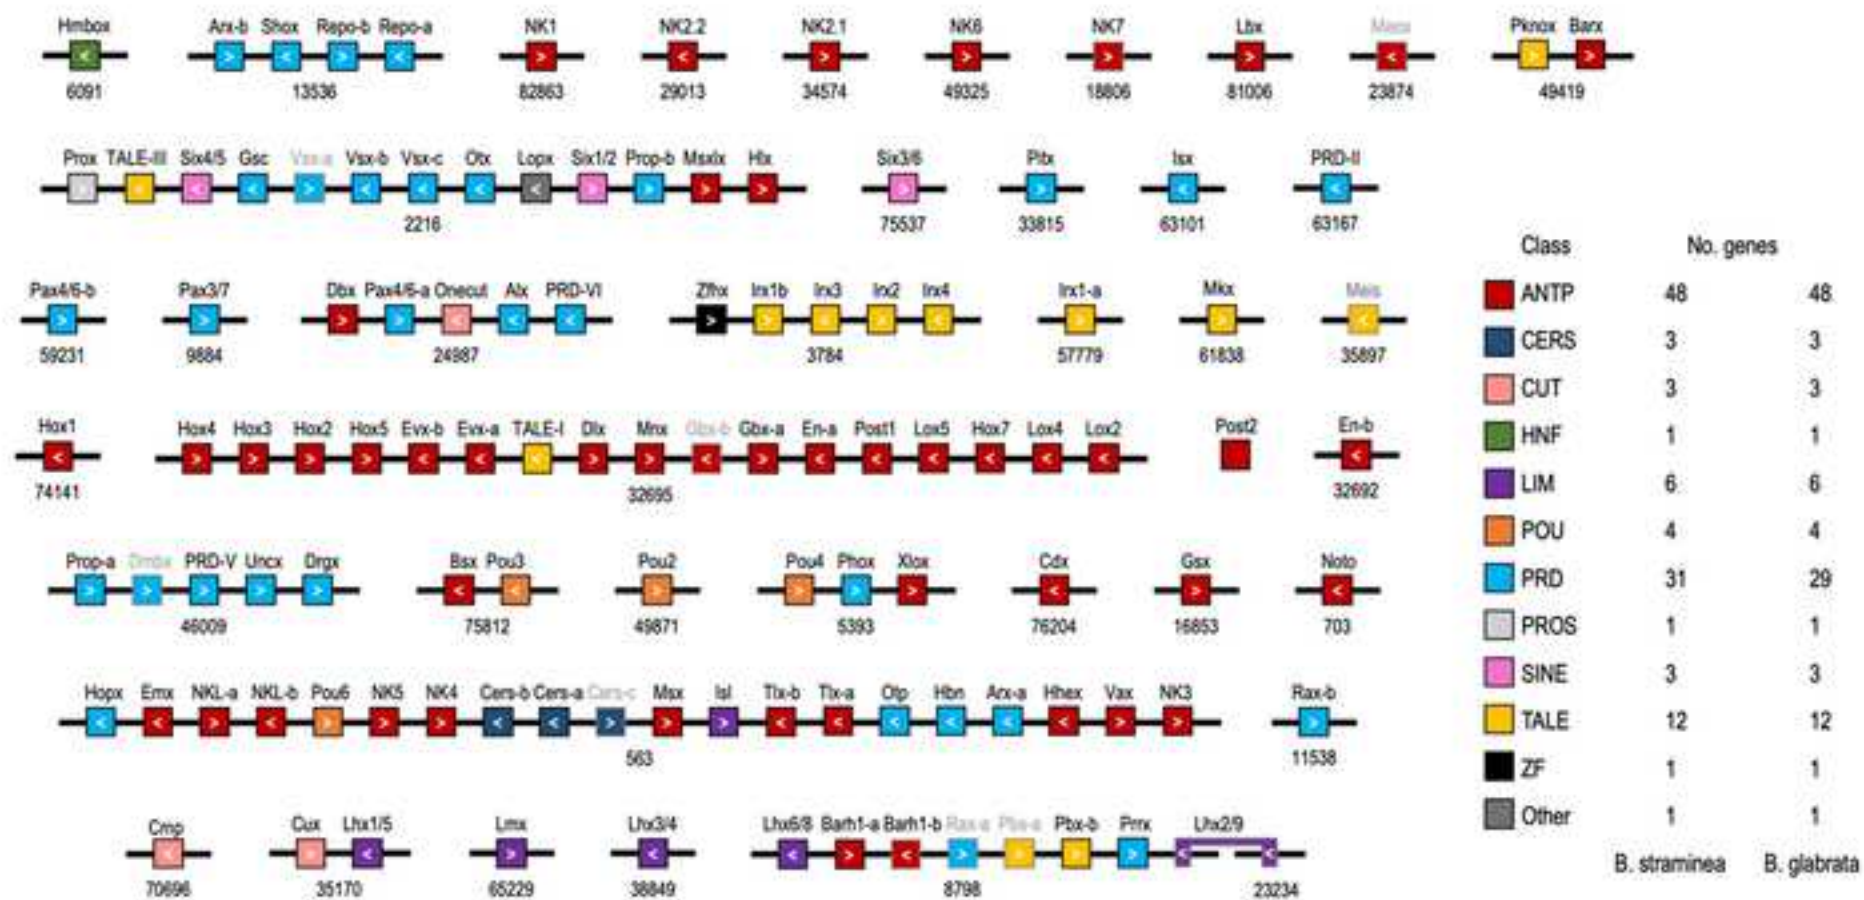

Fig 2

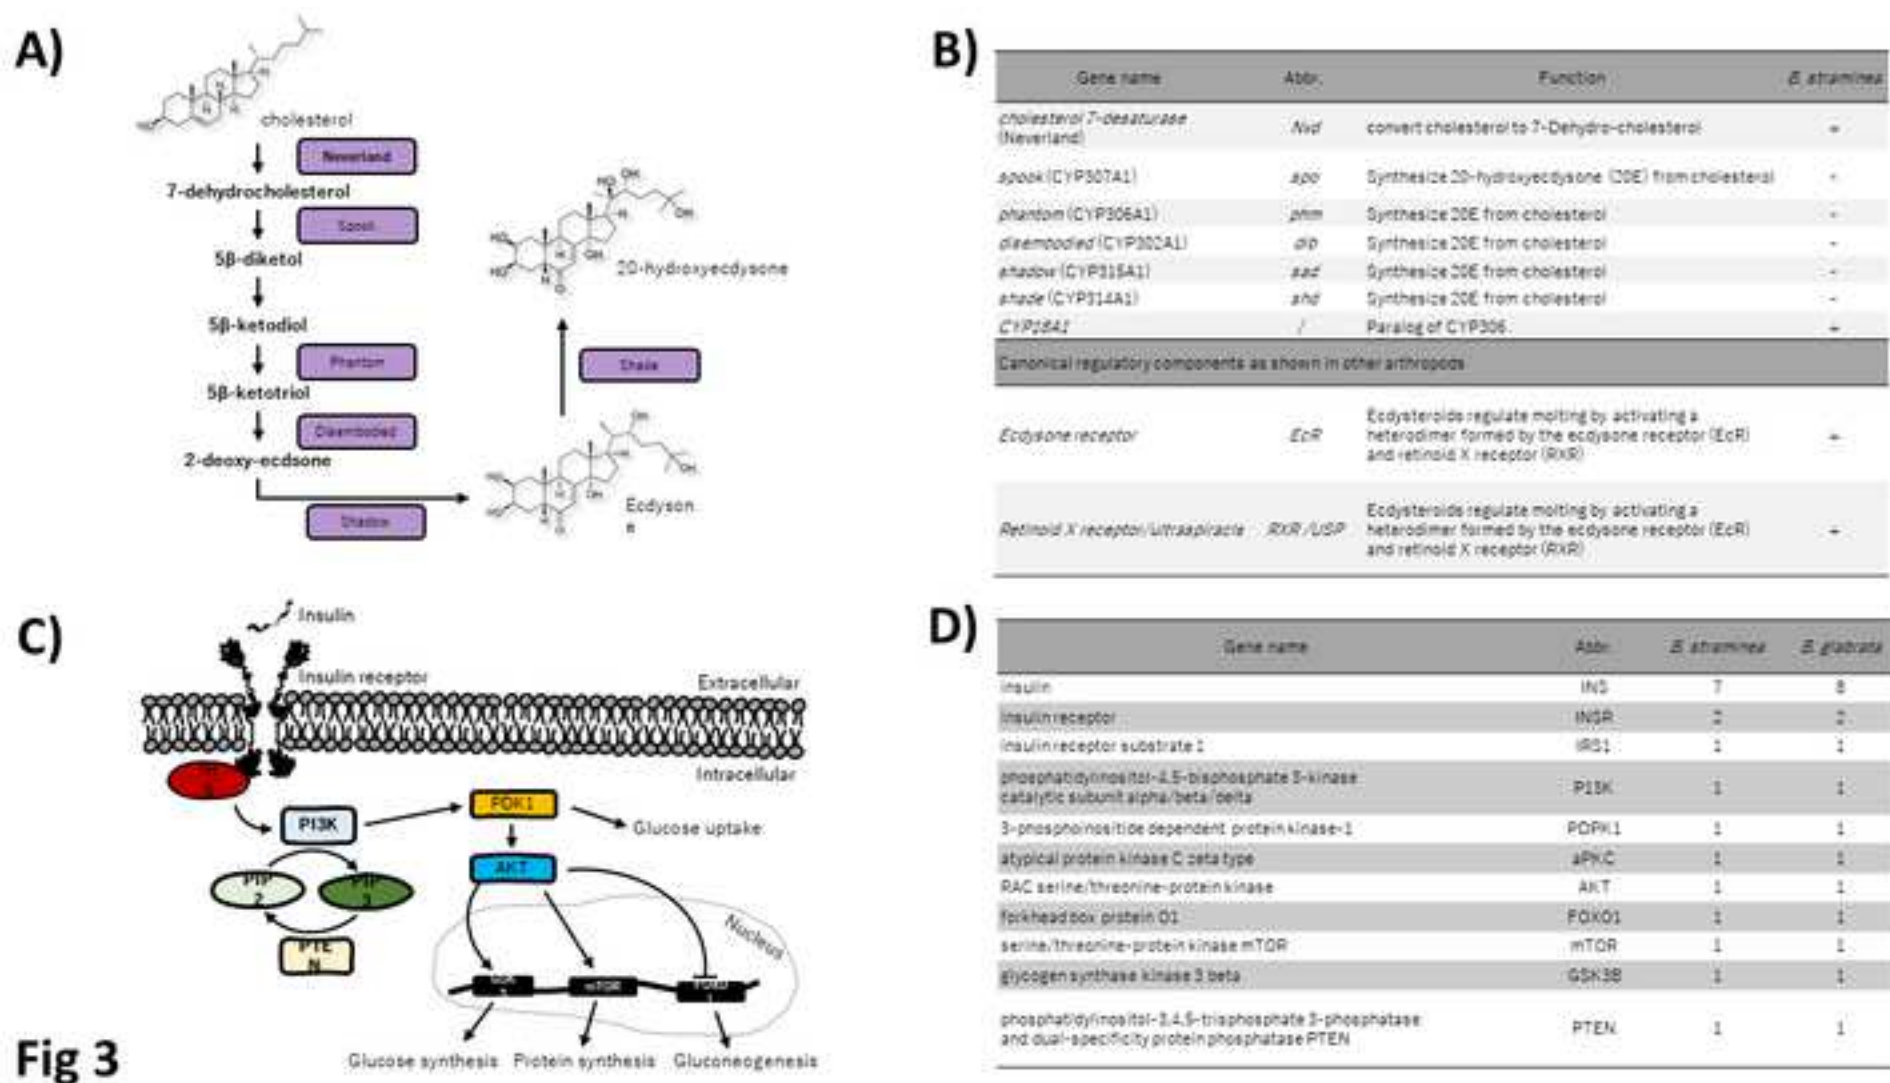

Fig 3



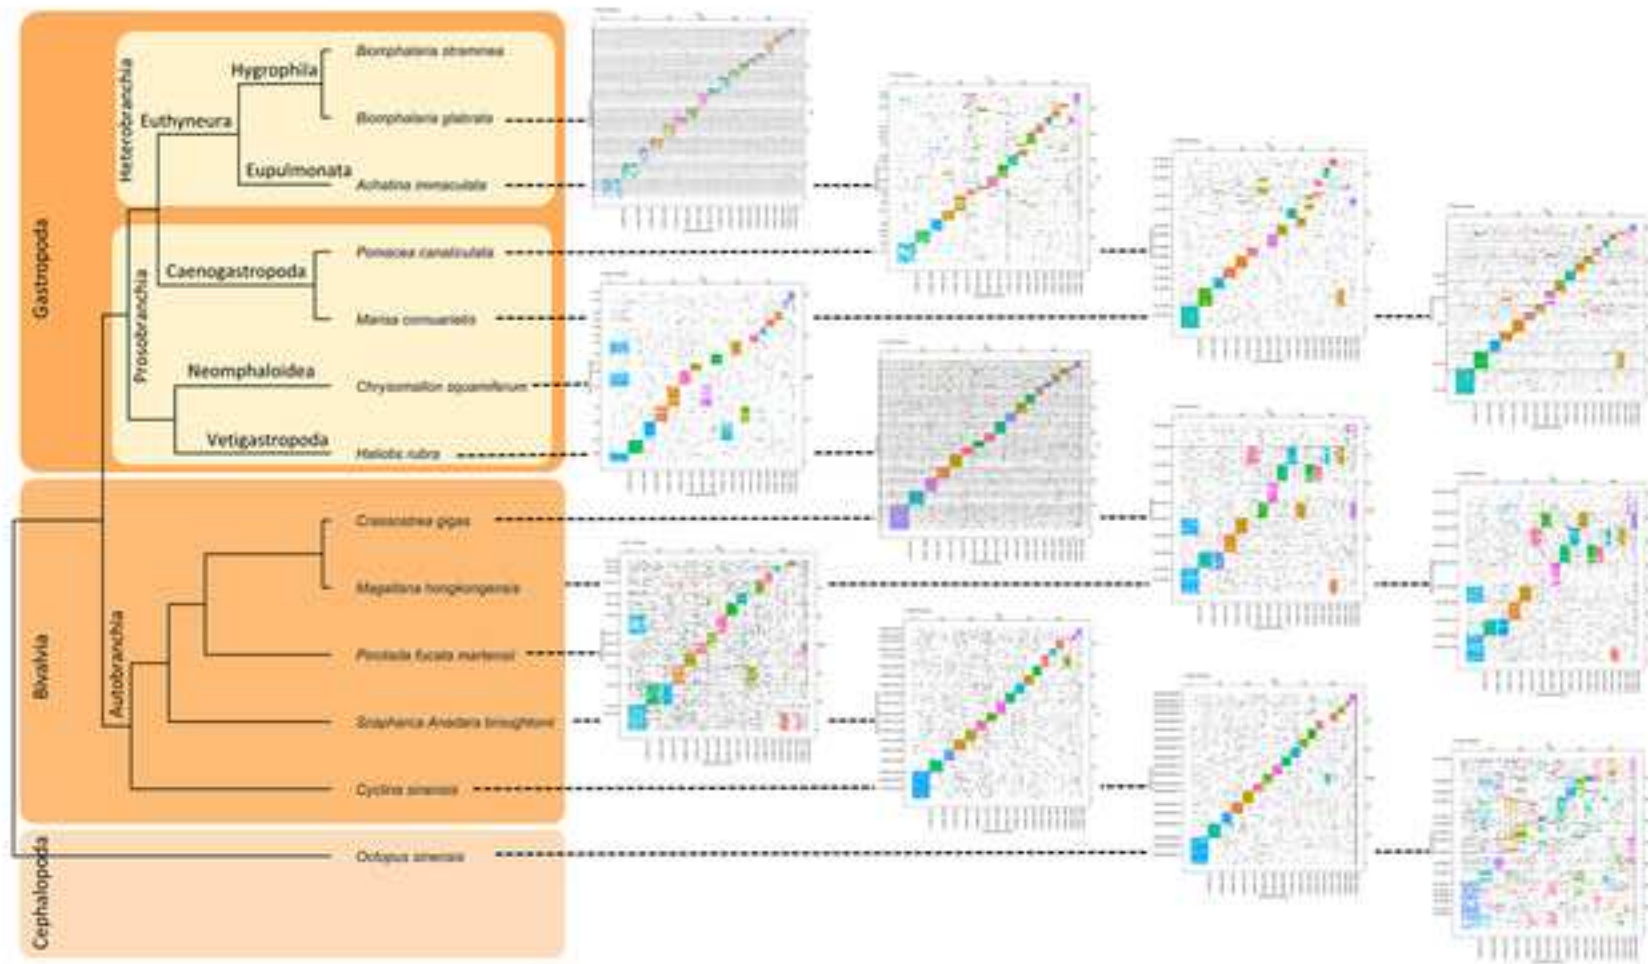

Fig 4

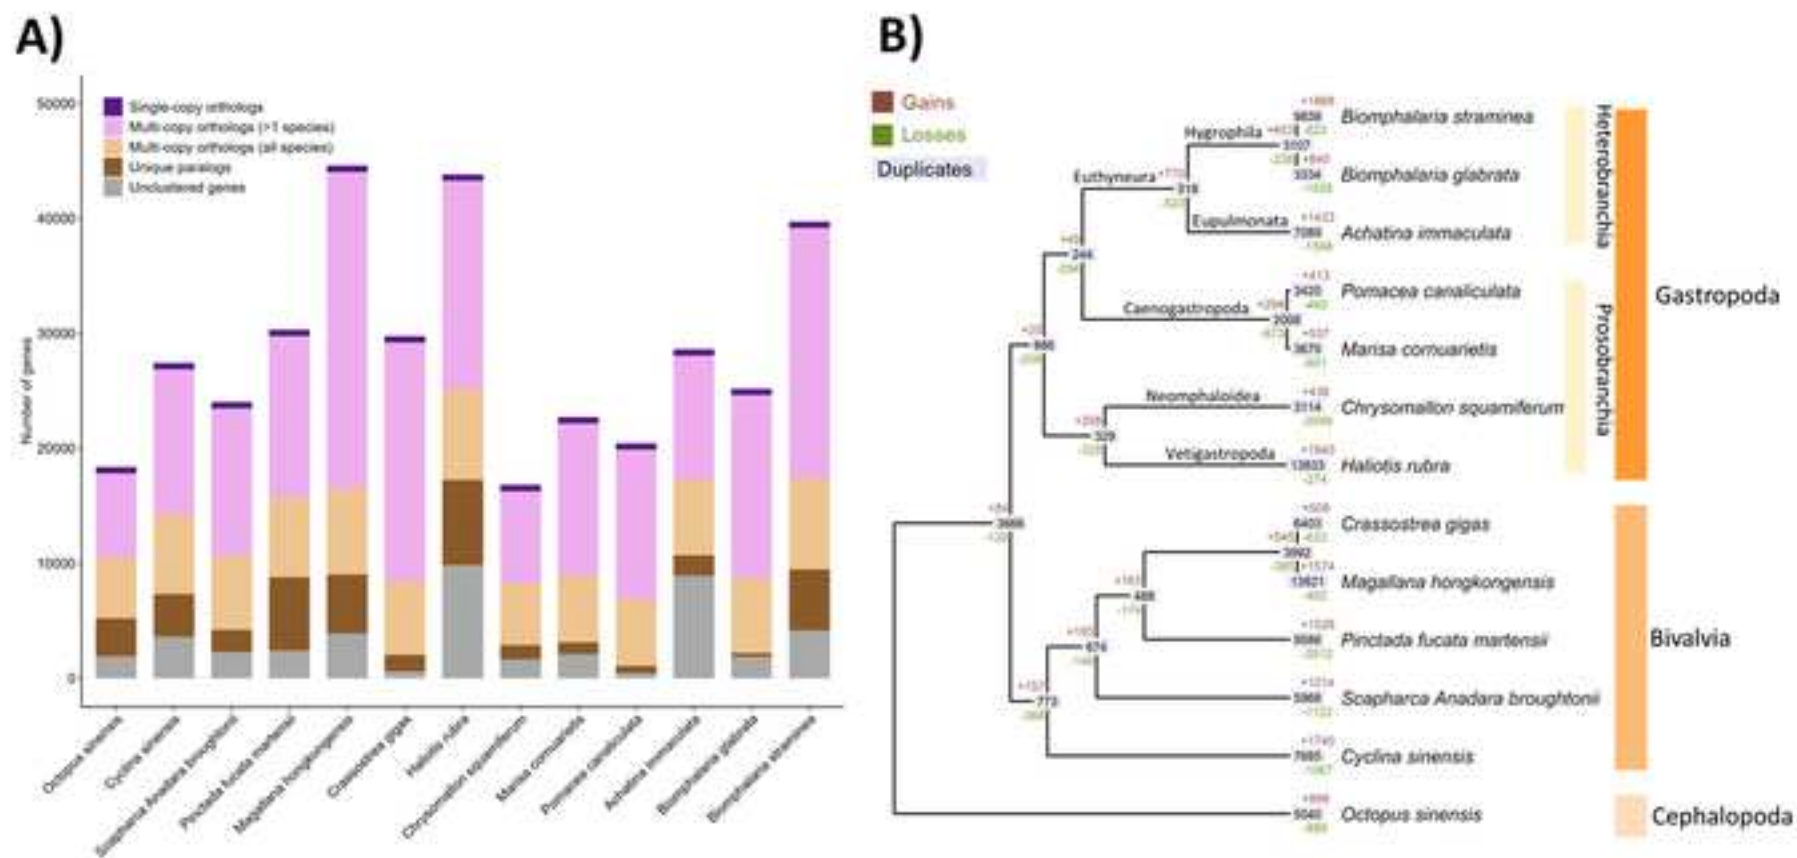

Fig 5

A)

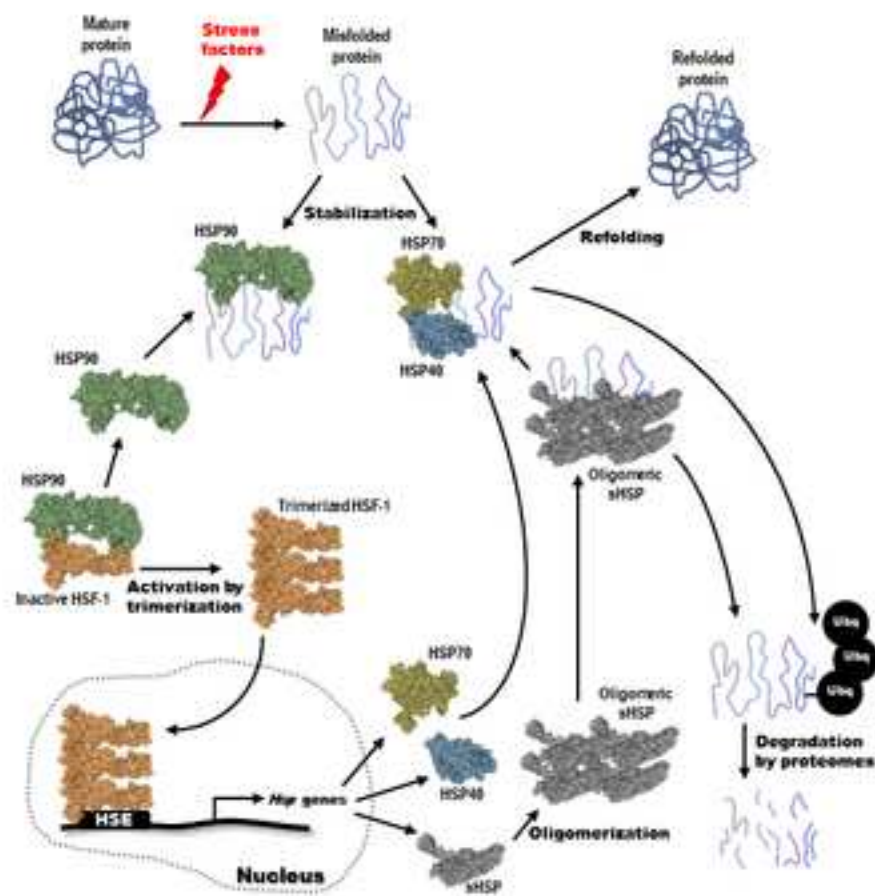

Fig 6

B)

| Order          | Family                                 | Species                            | HSPE* | HSPB | HSP40 | HSP70 | HSPC (HSP90) | HSP110 |
|----------------|----------------------------------------|------------------------------------|-------|------|-------|-------|--------------|--------|
| Gastropoda     | Planorbidae                            | <i>Biomphalaria straminea</i>      | 2     | 7    | 44    | 41    | 5            | 6      |
|                | Planorbidae                            | <i>Biomphalaria glabrata</i>       | 4     | 5    | 32    | 11    | 2            | 1      |
|                | Malacidae                              | <i>Malaxis discus</i>              | 1     | 12   | 26    | 18    | 1            | 0      |
|                | Ampullariidae                          | <i>Lottia gigantea</i>             | 2     | 11   | 33    | 15    | 4            | 2      |
|                | Ampullariidae                          | <i>Lanistes nyassanus</i>          | 2     | 9    | 35    | 13    | 3            | 1      |
|                | Ampullariidae                          | <i>Marisa cornuarietis</i>         | 2     | 12   | 35    | 13    | 3            | 2      |
|                | Ampullariidae                          | <i>Pomacea canaliculata</i>        | 2     | 13   | 36    | 12    | 3            | 2      |
|                | Ampullariidae                          | <i>Pomacea maculata</i>            | 2     | 12   | 36    | 10    | 3            | 2      |
|                | Lymnaeidae                             | <i>Radix auricularia</i>           | 2     | 9    | 27    | 24    | 3            | 2      |
|                | Pelteospiroidae                        | <i>Chrysomallon squamiferum</i>    | 2     | 10   | 32    | 16    | 3            | 1      |
|                | Achatinidae                            | <i>Achatina fulica</i>             | 3     | 14   | 37    | 26    | 5            | 3      |
|                | Achatinidae                            | <i>Achatina immaculata</i>         | 4     | 14   | 33    | 22    | 5            | 4      |
| Bivalvia       | Ostreida                               | <i>Magallana hongkongensis</i>     | 2     | 20   | 50    | 123   | 5            | 2      |
|                | Ostreida                               | <i>Crassostrea gigas</i>           | 2     | 12   | 39    | 137   | 4            | 3      |
|                | Ostreida                               | <i>Crassostrea virginica</i>       | 3     | 18   | 50    | 142   | 4            | 2      |
|                | Ostreida                               | <i>Saxostrea glomerata</i>         | 2     | 13   | 40    | 110   | 3            | 1      |
|                | Mytiliida                              | <i>Bathymodiolus pilsbromi</i>     | 2     | 7    | 40    | 103   | 3            | 2      |
|                | Mytiliida                              | <i>Modiolus philippinarum</i>      | 2     | 14   | 38    | 87    | 3            | 2      |
|                | Pteriida                               | <i>Pinctada fucata</i>             | 2     | 12   | 35    | 89    | 3            | 3      |
|                | Pteriida                               | <i>P. f. martensii</i>             | 0     | 10   | 40    | 95    | 3            | 2      |
|                | Pectinida                              | <i>Mizuhopecten yessoensis</i>     | 2     | 8    | 36    | 61    | 3            | 2      |
|                | Veneriida                              | <i>Cyclina sinensis</i>            | 4     | 12   | 42    | 77    | 5            | 2      |
| Arcida         | <i>Scapharca (Anadara) broughtonii</i> | 2                                  | 11    | 41   | 81    | 4     | 2            |        |
| Cephalopoda    | Octopodidae                            | <i>Octopus bimaculoides</i>        | 2     | 8    | 32    | 9     | 4            | 3      |
|                | /                                      | <i>Architeuthis dux</i> (squid)    | 2     | 8    | 28    | 16    | 4            | 3      |
|                | /                                      | <i>Octopus sinensis</i>            | 3     | 8    | 34    | 16    | 11           | 3      |
| Annelida       | Clitellata                             | <i>Helobdella robusta</i>          | 2     | 15   | 37    | 10    | 3            | 2      |
|                | Polychaeta                             | <i>Capitella teleta</i>            | 2     | 23   | 34    | 34    | 4            | 2      |
| Plathelminthes | Cestoda                                | <i>Echinococcus multilocularis</i> | 2     | 4    | 25    | 49    | 6            | 6      |
|                | Trematoda                              | <i>Schistosoma mansoni</i>         | 2     | 11   | 25    | 6     | 3            | 2      |

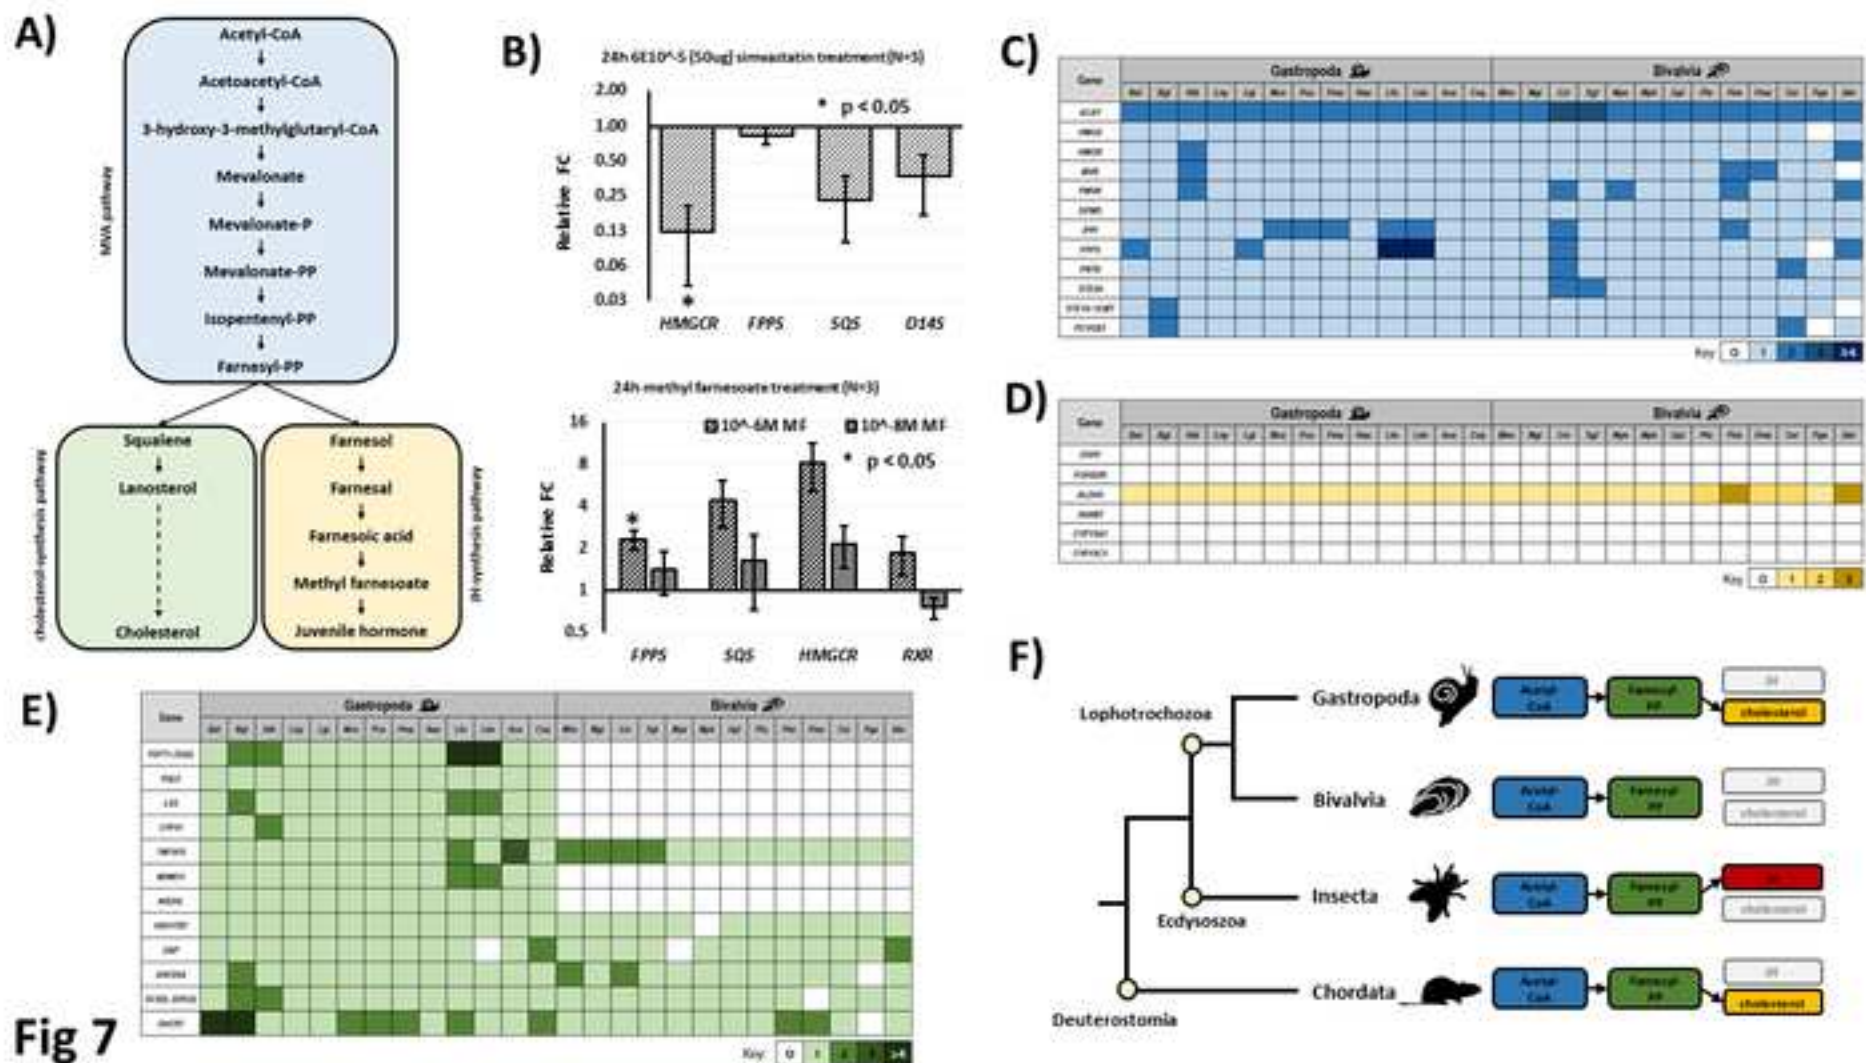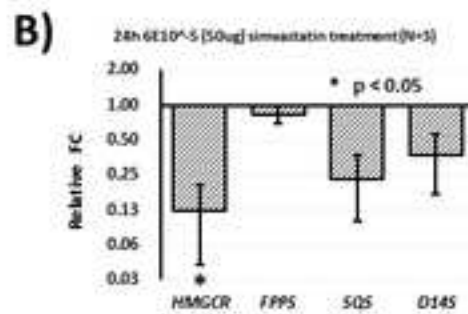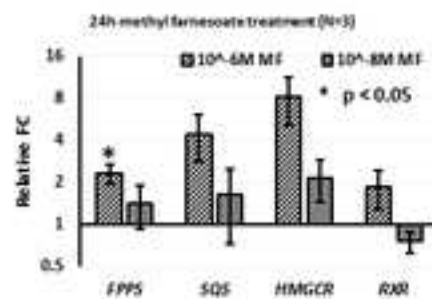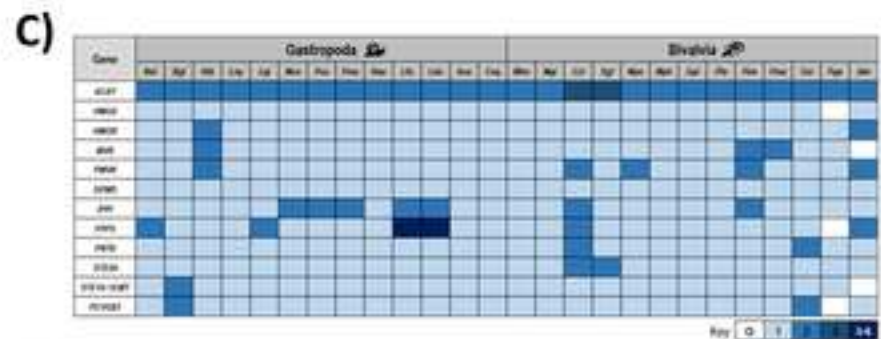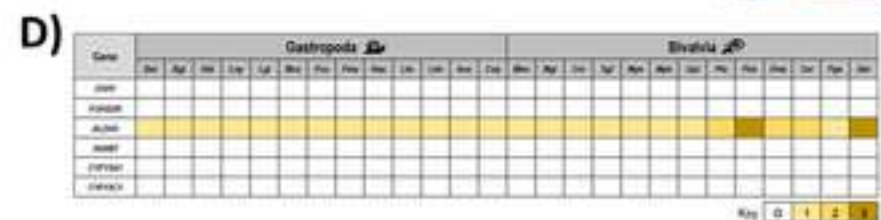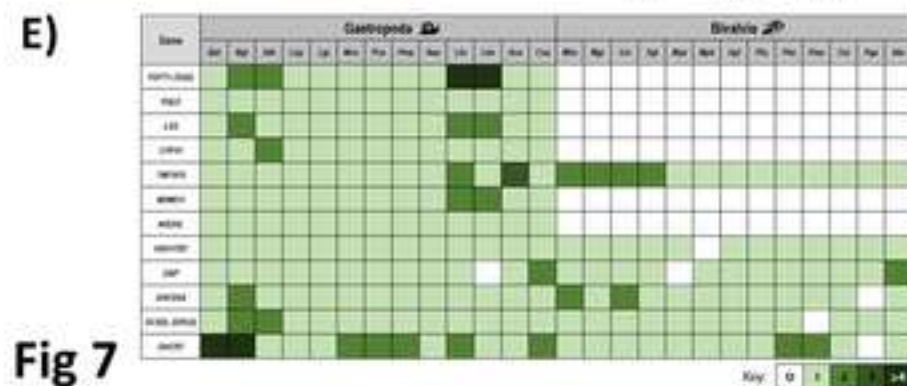

Fig 7

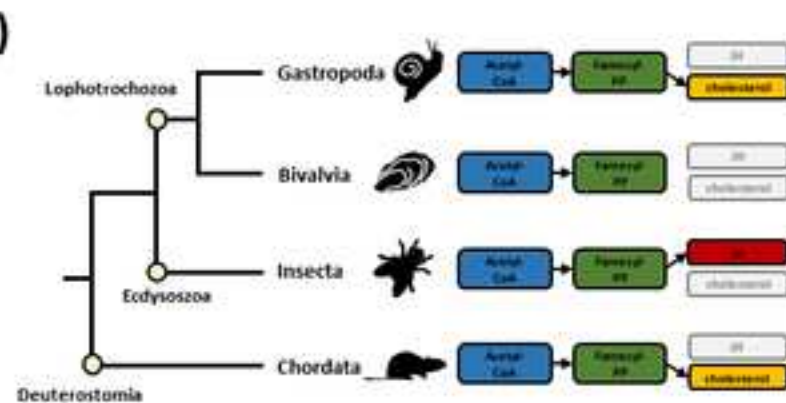



Click here to access/download  
**Supplementary Material**  
S1. Sequencing data.xls



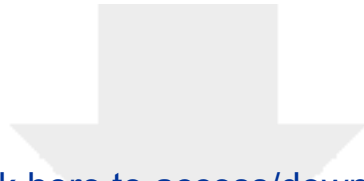

[Click here to access/download](#)

**Supplementary Material**

**S2a\_HboxSeqsSyntenYParaHox.xlsx**

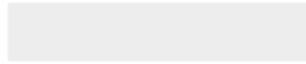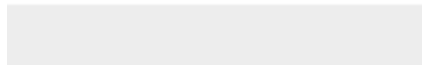



Click here to access/download  
**Supplementary Material**  
S2b\_B.glabrata\_Hboxes.jpg





Click here to access/download  
**Supplementary Material**  
S3. Ecdysteroid.xlsx





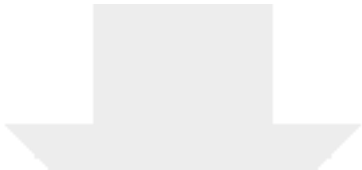

Click here to access/download  
**Supplementary Material**  
S4. Insulin.xlsx





Click here to access/download  
**Supplementary Material**  
S5. Syntenypptx



Click here to access/download  
**Supplementary Material**  
S6. Gene gain and loss.xlsx



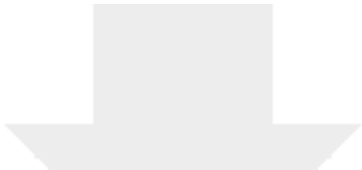

Click here to access/download  
**Supplementary Material**  
S7. HSP.xlsx



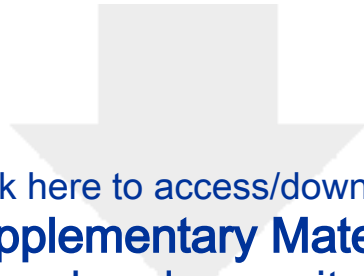

[Click here to access/download](#)

**Supplementary Material**

S8. Cholesterol and sesquiterpenoid.xlsx

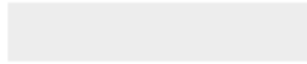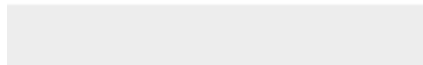



Click here to access/download  
**Supplementary Material**  
S9. Phylogentic trees.pptx





Click here to access/download  
**Supplementary Material**  
S10. Tables.pptx



Supplement: giac012_giga-d-21-00243_revision_2.pdf [file giac012_giga-d-21-00243_revision_2.pdf]
