# Supplementary material for: Genome of the ramshorn snail Biomphalaria straminea—an obligate intermediate host of schistosomiasis
Source: PubMed Central journal article supplement (PMC8848322; doi:10.1093/gigascience/giac012), 2022-02-15
Supplement: giac012_response_to_reviewer_comments_revision_1.pdf [file giac012_response_to_reviewer_comments_revision_1.pdf]

## Author's Response To Reviewer Comments

Close

The data availability section has now been completed as requested. Thank you.

Close
